# Supplementary material for: No effects of the antiandrogens cyproterone acetate (CPA), flutamide and p,p’-DDE on early sexual differentiation but CPA-induced retardation of embryonic development in the domestic fowl (Gallus gallus domesticus)
Source: PeerJ. 2023 Oct 23;11:e16249. doi: 10.7717/peerj.16249 (PMC10601917; doi:10.7717/peerj.16249)
Supplement: Supplemental Information 1 — All measurements for general or gonad-based endpoints of untreated and substance treated embryos. [file peerj-11-16249-s001.xlsx]

## Sheet: cyproterone acetate
substance:	cyproterone acetate (CPA)											substance:	cyproterone acetate (CPA)											substance:	cyproterone acetate (CPA)							substance:	cyproterone acetate (CPA)						substance:	cyproterone acetate (CPA)						substance:	cyproterone acetate (CPA)
endpoint:	cortex thickness [µm]											endpoint:	cortex thickness [µm]											endpoint:	seminiferous tubules [%]		total area of picture=	136000	µm² = 100%			endpoint:	gonad surface area [mm²]						endpoint:	gonad surface area [mm²]						endpoint:	length of skull, ulna and tarsometatarsus [cm]
genetic sex:	female											genetic sex:	male											genetic sex:	male							genetic sex:	female						genetic sex:	male						genetic sex:	male + female
test group	embryo no.	slice no.	values measured on slice [µm]					slice mean [µm]	embryo mean [µm]	group mean [µm]		test group	embryo no.	slice no.	measurements per slice [µm]					slice mean [µm]	embryo mean [µm]	group mean [µm]		test group	embryo no.	slice no.	slice mean [µm²]	slice mean [%]	embryo mean [%]	group mean [%]		test group	embryo no.	left ovary [mm²]	right ovary [mm²]	group mean left [mm²]	group mean right [mm²]		test group	embryo no.	left testis [mm²]	right testis [mm²]	group mean left [mm²]	group mean right [mm²]		test group	embryo no.	length [cm]
			1	2	3	4	5								1	2	3	4	5																													skull	ulna
untreated control	1	1	150.005	142.848	145.862	124.972	123.73	137.483	129.301	141.621		untreated control	1	1	7.372	7.512	5.803	8.302	7.96	7.3898	9.32988	9.18622		untreated control	1	1	62248.4	45.7709	38.9354	34.1824		untreated control	1	10.0761	2.35276	10.9441	2.10339		untreated control	1	3.93777	3.20166	4.34492	3.84492		untreated control	1	2.766	1.688
		2	113.496	134.539	126.321	130.267	102.442	121.413						2	9.727	10.516	9.592	6.264	8.79	8.9778						2	61253.6	45.0394					2	11.0074	2.27729					2	4.29145	3.52078					2	3.054	1.502
		3	119.053	120.868	145.375	125.236	120.75	126.256						3	11.464	7.66	9.619	10.138	7.12	9.2002						3	58264.9	42.8419					3	11.6756	1.72515					3	4.6748	4.09462					3	3	1.706
		4	105.833	151.35	134.001	142.675	117.053	130.182						4	9.878	8.207	8.302	8.67	6.305	8.2724						4	55288.9	40.6536					4	8.91064	1.80246					4	4.84657	4.81543					4	3.088	1.838
		5	102.909	131.69	132.503	110.003	123.333	120.088						5	9.223	10.146	8.995	12.148	11.667	10.4358						5	55533.5	40.8335					5	11.755	2.08442					5	3.97401	3.59212					5	3.042	1.654
		6	138.456	125.225	133.843	160.317	143.807	140.33						6	7.917	6.68	9.583	7.917	7.5	7.9194						6	52160.1	38.353					6	12.2396	2.37826				solvent control	1	4.0651	3.43354	3.78045	3.68608			6	3.18	1.47
		7	119.62	117.851	122.489	102.079	95.837	111.575						7	8.015	11	11.373	9.665	10.833	10.1772						7	47125.2	34.6509				solvent control	1	9.58219	1.65093	9.33421	1.9213			2	3.4802	3.6377					7	3.132	1.612
		8	136.239	149.267	145.22	146.373	154.29	146.278						8	11.25	8.79	8.79	7.193	9.167	9.038						8	44034.4	32.3782					2	10.3577	1.53288					3	3.08089	2.51622					8	3.142	1.41
		9	209.874	146.839	157.244	105.843	123.856	148.731						9	11.859	9.904	9.317	9.363	8.76	9.8406						9	45076.2	33.1443					3	9.49175	1.78982					4	4.49561	5.15685					9	3.016	1.652
		10	111.48	118.913	122.071	108.455	92.425	110.669						10	12.486	11.38	11.577	11.932	12.863	12.0476						10	48535.9	35.6882					4	11.4669	3.08637				0.2 µg CPA/g egg	1	4.56906	3.32699	4.07964	3.66416			10	3	1.636
	2	1	139.087	166.835	149.176	186.735	165.355	161.438	142.698				2	1	8.09	8.58	8.218	7.862	9.148	8.3796	8.78304				2	1	43634.7	32.0844	31.1264				5	5.77246	1.5465					2	3.90696	3.86567					11	3.042	1.698
		2	154.877	166.02	116.219	161.866	115.665	142.929						2	12.535	8.344	8.015	9.501	10.291	9.7372						2	33995	24.9963				0.2 µg CPA/g egg	1	7.20871	1.32726	10.4112	2.03825			3	3.96376	3.78114				solvent control	1	3.018	1.616
		3	106.474	108.788	136.346	131.387	120.003	120.6						3	9.138	7.419	6.783	7.289	7.603	7.6464						3	39827.4	29.2849					2	10.8332	1.31136					4	3.52203	3.44162					2	3.108	1.56
		4	138.245	175.05	162.754	121.117	126.913	144.816						4	10.146	8.437	8.186	8.015	9.754	8.9076						4	44100.3	32.4267					3	11.1657	2.25125					5	4.96712	4.85471					3	3.032	1.583
		5	221.38	169.732	160.262	167.11	205.388	184.774						5	6.468	6.509	6.588	5.966	5.606	6.2274						5	40742.5	29.9577					4	9.19602	2.34256					6	4.27843	3.87815					4	3.194	1.458
		6	99.892	133.638	110.003	106.51	127.813	115.571						6	14.148	11.785	9.223	10.146	10.833	11.227						6	44772.6	32.921					5	11.94	2.61719					7	3.35015	2.50081					5	3.08	1.504
		7	117.63	98.918	97.997	121.12	148.371	116.807						7	10.541	8.829	8.09	8.829	10.712	9.4002						7	48204.9	35.4448					6	8.79519	1.55181				2 µg CPA/g egg	1	4.81445	3.93859	3.41008	2.89463			6	3.08	1.748
		8	165.842	155.02	129.177	100.919	129.024	135.996						8	9.1	11	9.52	9.1	8.186	9.3812						8	42293.1	31.0978					7	11.5932	2.7379					2	1.92263	1.69727					7	2.4	1.326
		9	151.797	205.658	207.674	210.781	275.954	210.373						9	9.223	8.975	9.223	6.985	7.512	8.3836						9	40369.4	29.6834					8	10.9191	2.40283					3	3.41526	2.00157					8	2.352	1.258
		10	86.751	86.442	131.487	48.827	114.858	93.673						10	8.829	8.829	9.317	6.897	8.829	8.5402						10	45379	33.3669					9	10.5191	1.9681					4	2.90544	2.92518					9	3.042	1.468
	3	1	147.271	128.66	161.008	180.094	170.051	157.417	151.33				3	1	9.619	9.904	8.7	10.68	9.904	9.7614	9.14842				3	1	47021.2	34.5744	35.7763				10	11.8317	1.69493					5	4.30235	3.91162				0.2 µg CPA/g egg	1	2.618	1.486
		2	170.294	170.963	150.836	150.916	175.904	163.783						2	10.078	11.008	11	11.071	10.817	10.7948						2	49512	36.4059					11	10.5211	2.21555					6	2.06359	1.80572					2	2.758	1.546
		3	142.692	152.09	148.364	146.858	161.48	150.297						3	8.829	6.346	7.372	9.428	8.09	8.013						3	47471.4	34.9054				2 µg CPA/g egg	1	8.44406	1.42399	7.74909	1.45097			7	4.44683	3.98248					3	3.048	1.714
		4	173.817	136.364	126.431	138.002	174.294	149.782						4	11.008	11.219	11.335	11	10.623	11.037						4	45716	33.6147					2	6.75543	1.22618				20 µg CPA/g egg	1	3.8112	2.24691	3.8112	2.24691			4	2.766	1.57
		5	161.525	163.046	145.871	149.167	169.372	157.796						5	10.017	10.905	8.917	8.09	10.623	9.7104						5	43983.7	32.3409					3	7.14106	-												5	2.81	1.72
		6	143.571	159.594	174.294	114.243	171.796	152.7						6	8.975	12.112	9.363	11.219	9.807	10.2952						6	39084.7	28.7388					4	8.65582	1.70275												6	2.928	1.576
		7	143.742	156.702	141.689	181.898	111.087	147.024						7	8.79	8.498	11.696	6.783	8.302	8.8138						7	56598.1	41.6162				20 µg CPA/g egg	-	-	-	-	-										7	2.75	1.642
		8	122.35	130.219	140.841	156.156	207.921	151.497						8	4.29	4.507	5.035	5.221	5.221	4.8548						8	54893.2	40.3627																			8	3.06	1.736
		9	157.72	149.334	162.765	157.332	141.676	153.765						9	8.59	10.017	7.66	9.665	7.512	8.6888						9	42253.6	31.0689																			9	2.84	1.638
		10	120.234	102.774	156.269	146.705	120.234	129.243						10	8.946	8.186	10.905	10.138	9.4	9.515						10	60024.3	44.1355																			10	2.716	1.5
	4	1	175.614	167.757	161.249	150.52	131.511	157.33	140.19				4	1	10.541	8.975	8.58	7.277	8.437	8.762	10.4455				4	1	44188.2	32.4913	32.6215																		11	3.208	1.648
		2	159.208	135.221	145.435	148.371	136.221	144.891						2	13.623	11.939	8.79	11.008	11.008	11.2736						2	46405.9	34.122																			12	3.02	1.438
		3	179.701	178.903	165.364	150.87	139.655	162.899						3	10.833	11.18	11.555	12.148	12.863	11.7158						3	41022.2	30.1634																			13	2.82	1.648
		4	171.026	153.265	140.633	131.056	140.804	147.357						4	11.373	10.442	9.878	10.078	8.79	10.1122						4	43665.3	32.1068																			14	2.8	1.562
		5	149.188	168.236	126.864	120.445	96.354	132.217						5	10.146	10.45	9.317	13.8	10.68	10.8786						5	43939.2	32.3083																			15	3.022	1.76
		6	103.387	112.549	127.511	107.384	164.167	123						6	12.112	10.809	11.441	9.592	7.784	10.3476						6	46463	34.164																			16	2.8	1.63
		7	166.527	119.501	133.651	103.9	109.052	126.526						7	12.304	10.45	10.45	9.691	9.363	10.4516						7	43249.5	31.8011																			17	3.12	1.424
		8	124.454	84.971	91.67	84.27	92.064	95.4858						8	12.611	10.712	11.851	10.865	10.623	11.3324						8	44810.6	32.949																			18	2.852	1.402
		9	184.767	151.497	157.379	125.513	173.135	158.458						9	9.878	7.66	9.807	11.733	11.932	10.202						9	46167.7	33.9468																		2 µg CPA/g egg	1	2.402	1.312
		10	160.702	144.513	167.075	149.232	147.158	153.736						10	8.437	11.939	8.015	10.069	8.437	9.3794						10	43740.3	32.162																			2	2.278	1.502
	5	1	126.34	120.453	110.818	117.023	121.43	119.213	127.646				5	1	10.833	11.373	11.494	13.566	8.975	11.2482	8.22422				5	1	42299	31.1022	32.4524																		3	1.79	0.978
		2	120.675	103.283	108.131	123.392	108.66	112.828						2	11.607	10.68	10.442	6.009	8.76	9.4996						2	48247.4	35.476																			4	2.162	1.2
		3	115.629	106.386	115.764	110.309	92.684	108.154						3	10.961	9.904	10.017	4.859	7.132	8.5746						3	43978	32.3367																			5	2.432	0.958
		4	103.689	111.81	114.121	114.434	93.705	107.552						4	8.946	9.252	10.009	9.52	7.083	8.962						4	55986.1	41.1663																			6	2.528	1.3
		5	107.874	131.226	146.411	112.361	114.897	122.554						5	9.223	6.588	6.985	6.897	6.783	7.2952						5	43038.7	31.6461																			7	2.116	1.47
		6	103.983	128.285	149.188	96.195	105.942	116.719						6	8.7	8.995	9.223	4.249	4.751	7.1836						6	42999.1	31.617																			8	2.18	1.23
		7	109.56	102.554	107.703	128.463	121.635	113.983						7	9.727	7.383	10.68	6.36	6.009	8.0318						7	46619.4	34.279																			9	2.396	1.326
		8	149.928	120.514	124.421	106.595	111.371	122.566						8	6.509	6.834	6.36	7.419	8.004	7.0252						8	46312.7	34.0534																			10	2.29	1.4
		9	161.695	167.906	166.875	186.758	184.395	173.526						9	9.363	8.186	6.731	8.015	6.25	7.709						9	34012	25.0088																			11	2.308	1.108
		10	166.243	165.254	190.029	182.508	192.805	179.368						10	6.522	6.346	7.454	5.789	7.454	6.713						10	37860.4	27.8385																			12	2.44	1.3
	6	1	151.669	144.715	154.605	178.345	186.238	163.114	158.561			solvent control	1	1	11.335	8.7	7.512	8.218	6.719	8.4968	8.91882	8.95153		solvent control	1	1	48944.4	35.9886	31.0412	29.9732																20 µg CPA/g egg	1	1.846	1
		2	66.797	122.353	177.273	164.488	196.414	145.465						2	12.083	14.796	8.75	10.146	15.023	12.1596						2	40991	30.1404																			2	1.732	0.838
		3	150.021	250.693	245.204	142.127	172.516	192.112						3	7.083	7.603	6.25	6.468	5.559	6.5926						3	48129.5	35.3893																			3	2.152	0.94
		4	203.647	134.397	161.525	155.853	185.745	168.233						4	6.468	9.223	8.302	8.7	13.242	9.187						4	28617.9	21.0426																			4	2	0.964
		5	140.841	144.962	118.477	126.37	124.421	131.014						5	11.38	8.946	11.555	9.317	10.291	10.2978						5	41834.5	30.7607																			5	2.204	1.288
		6	180.408	107.668	123.19	131.067	154.841	139.435						6	5.833	5.221	8.427	5.417	5.154	6.0104						6	47823.4	35.1643
		7	146.211	164.707	111.021	149.101	134.99	141.206						7	11.464	8.302	8.047	5.966	7.683	8.2924						7	40363.7	29.6792
		8	154.389	169.117	162.297	165.701	167.691	163.839						8	6.985	8.498	10.672	8.858	10.647	9.132						8	46004.9	33.8271
		9	145.022	156.341	210.2	158.905	171.083	168.31						9	10.833	8.047	11.38	8.344	8.207	9.3622						9	41724.5	30.6798
		10	200.667	165.672	177.799	156.569	163.684	172.878						10	9.428	9.446	10.672	9.727	9.014	9.6574						10	37726.2	27.7399
solvent control	1	1	111.695	112.528	138.637	141.797	157.841	132.5	149.927	150.332			2	1	5.48	7.512	7.546	8.427	7.546	7.3022	8.07254				2	1	35260.9	25.9272	25.1264
		2	164.099	151.284	123.615	135.874	148.924	144.759						2	10.549	10.712	10.138	10.623	10.961	10.5966						2	37122.9	27.2963
		3	193.378	135.874	142.795	152.728	141.463	153.248						3	7.512	6.897	8.76	8.437	8.975	8.1162						3	33015.3	24.2759
		4	165.38	161.525	166.883	167.037	151.327	162.43						4	10.417	6.374	5.803	8.186	7.784	7.7128						4	38495.3	28.3054
		5	172.613	175.634	113.346	131.564	112.206	141.073						5	7.917	6.872	6.25	7.193	7.083	7.063						5	31297.2	23.0127
		6	148.535	156.746	128.941	156.476	181.265	154.393						6	7.512	7.784	7.649	6.152	5.221	6.8636						6	31479.5	23.1467
		7	166.76	152.208	148.782	152.327	164.657	156.947						7	7.083	6.731	7.828	6.346	8.427	7.283						7	30814.1	22.6574
		8	161.456	142.561	126.109	120.234	132.112	136.494						8	6.985	8.7	6.985	8.995	8.829	8.0988						8	38378.1	28.2192
		9	170.809	161.634	155.494	158.09	155.354	160.276						9	10.425	10.425	7.917	9.665	6.783	9.043						9	31406.9	23.0933
		10	108.093	168.236	166.454	165.773	177.173	157.146						10	10.215	9.4	7.383	8.047	8.186	8.6462						10	34448.3	25.3296
	2	1	208.09	194.654	174.589	189.746	170.656	187.547	178.024				3	1	8.839	8.09	10.249	8.79	10.086	9.2108	9.0428				3	1	46069.3	33.8745	32.3337
		2	208.113	211.824	188.843	197.844	140.5	189.425						2	9.204	5.833	8.498	6.25	8.995	7.756						2	38745	28.4889
		3	218.303	226.985	189.482	190.102	168.5	198.674						3	8.218	7.277	6.897	6.522	6.731	7.129						3	46191	33.964
		4	215.523	199.795	153.157	166.875	128.79	172.828						4	12.7	10.647	6.509	8.76	9.583	9.6398						4	48654.2	35.7751
		5	195.164	205.793	126.826	180.316	134.603	168.54						5	6.719	6.522	7.75	7.083	7.906	7.196						5	55876.9	41.086
		6	201.042	203.765	159.657	184.248	136.659	177.074						6	12.836	6.731	5	5.035	5.27	6.9744						6	44012.2	32.3619
		7	148.924	107.138	128.073	129.885	190.091	140.822						7	11.258	8.79	10.937	10.516	9.878	10.2758						7	40674.5	29.9077
		8	229.568	221.38	192.305	166.416	194.551	200.844						8	13.044	13.242	10.68	7.66	9.619	10.849						8	39277.8	28.8807
		9	219.129	206.52	223.335	184.56	152.142	197.137						9	14.678	14.796	8.344	11.335	9.167	11.664						9	37062.5	27.2518
		10	177.375	146.735	133.359	136.631	142.619	147.344						10	10.417	9.138	9.763	9.176	10.172	9.7332						10	43174.7	31.7461
	3	1	149.501	176.513	183.22	137.752	171.183	163.634	168.207				4	1	11.733	9.363	10.425	10.425	9.176	10.2244	9.77196				4	1	43850.9	32.2433	31.3915
		2	93.188	114.069	102.116	132.353	199.809	128.307						2	11.441	8.549	9.176	7.649	9.501	9.2632						2	44739.9	32.897
		3	176.549	169.642	170.589	147.378	189.737	170.779						3	12.388	8.907	9.014	8.76	7.454	9.3046						3	47736.5	35.1003
		4	185.272	151.532	158.414	189.246	167.798	170.452						4	10.086	10.516	8.858	10.623	10.078	10.0322						4	43979.7	32.338
		5	163.65	172.079	171.824	182.302	141.838	166.339						5	11.008	10.905	10.442	9.939	11.555	10.7698						5	41824.3	30.7532
		6	206.172	172.653	124.928	185.414	177.883	173.41						6	11.577	12.863	12.304	10.753	10.905	11.6804						6	46795	34.4081
		7	161.127	148.104	174.978	142.892	197.936	165.007						7	12.977	10.607	10.316	10.35	8.858	10.6216						7	40519.4	29.7937
		8	154.814	195.807	177.267	207.205	172.409	181.5						8	8.67	9.939	8.58	9.014	9.363	9.1132						8	44381.9	32.6338
		9	163.435	201.677	193.882	162.338	196.26	183.518						9	7.96	7.169	7.419	8.333	10.017	8.1796						9	41442.2	30.4722
		10	179.886	205.347	161.385	187.826	161.15	179.119						10	8.004	7.512	8.271	9.148	9.718	8.5306						10	31654.5	23.2754
	4	1	125.985	122.384	136.646	112.944	140.89	127.77	149.869			0.2 µg CPA/g egg	1	1	8.437	6.25	7.683	8.09	8.917	7.8754	9.67448	9.33672		0.2 µg CPA/g egg	1	1	40950.7	30.1108	29.7833	32.0446
		2	190.467	141.787	113.336	235.427	246.178	185.439						2	7.75	6.783	5.336	6.935	4.859	6.3326						2	39459.2	29.0141
		3	153.011	123.738	147.961	124.237	116.714	133.132						3	10.078	9.4	14.319	15.281	11.032	12.022						3	44321	32.589
		4	181.299	156.935	121.017	161.926	125.003	149.236						4	9.727	12.148	11.219	10.308	12.5	11.1804						4	44078.6	32.4108
		5	78.373	122.523	128.757	110.082	130.682	114.083						5	8.76	12.339	17.083	14.494	14.872	13.5096						5	42019.1	30.8964
		6	230.044	221.267	187.12	161.617	148.258	189.661						6	9.754	9.511	9.939	7.289	6.482	8.595						6	40762	29.972
		7	126.431	145.344	139.229	117.059	109.598	127.532						7	9.317	5.833	8.333	10.215	7.12	8.1636						7	39235.9	28.85
		8	235.997	146.026	149.316	178.491	143.421	170.65						8	7.096	7.683	6.667	9.176	9.727	8.0698						8	43211.3	31.773
		9	148.408	115.353	86.426	140.915	140.54	126.328						9	10.138	12.148	12.836	8.839	8.207	10.4336						9	38169.3	28.0656
		10	183.746	174.268	175.248	198.874	142.146	174.856						10	9.665	10.841	10.425	10.442	11.441	10.5628						10	32845.8	24.1513
	5	1	95.091	90.004	120.488	90.849	101.752	99.6368	105.634				2	1	8.79	9.252	8.207	9.252	10.172	9.1346	8.75772				2	1	63860.4	46.9562	35.202
		2	83.886	111.508	92.033	73.974	98.365	91.9532						2	9.619	8.186	7.928	12.112	9.665	9.502						2	41690.4	30.6547
		3	90.711	93.322	104.596	60.576	62.855	82.412						3	9.317	9.363	6.588	7.66	5.417	7.669						3	48259.9	35.4852
		4	135.657	119.728	152.09	195.541	200.501	160.703						4	11.032	8.58	8.207	6.067	6.985	8.1742						4	49679.7	36.5292
		5	91.295	112.599	124.479	126.417	177.678	126.494						5	7.862	8.549	7.683	7.683	7.419	7.8392						5	49293.1	36.2449
		6	65.021	87.599	80.941	101.752	78.333	82.7292						6	8.333	8.549	6.482	6.509	6.783	7.3312						6	41873.8	30.7895
		7	76.671	102.53	87.516	100	94.181	92.1796						7	8.375	9.583	9.252	8.907	7.096	8.6426						7	39128.1	28.7707
		8	138.132	128.174	113.336	103.286	88.325	114.251						8	11.763	8.7	9.754	8.829	11.622	10.1336						8	56409.4	41.4775
		9	110.758	101.246	92.919	75.765	93.244	94.7864						9	7.419	9.718	8.917	11.792	9.501	9.4694						9	45060.6	33.1328
		10	132.921	134.982	104.499	96.195	87.373	111.194						10	8.75	10.308	9.904	9.691	9.754	9.6814						10	43492.4	31.9797
0.2 µg CPA/g egg	1	1	107.951	103.689	110.155	81.862	61.7	93.0714	123.388	164.508			3	1	12.836	9.511	8.76	9.223	11.696	10.4052	10.1023				3	1	42228.3	31.0502	29.7016
		2	185.204	125.679	151.504	146.61	138.424	149.484						2	9.138	9.363	6.783	8.004	6.935	8.0446						2	52061.3	38.2804
		3	107.513	96.195	106.569	113.496	103.162	105.387						3	8.907	8.333	8.09	8.7	7.12	8.23						3	32145.5	23.6364
		4	103.474	108.429	107.215	104.596	121.795	109.102						4	9.939	10.172	8.946	10.078	7.083	9.2436						4	41764.1	30.7089
		5	120.698	105.843	135.098	104.3	106.396	114.467						5	13.851	7.828	12.836	10.817	7.66	10.5984						5	36454.5	26.8048
		6	194.231	162.865	132.183	136.14	162.126	157.509						6	11.335	7.928	6.897	8.437	8.907	8.7008						6	37489.8	27.566
		7	136.771	165.867	116.649	104.127	139.309	132.545						7	10.425	11.733	8.79	10.68	10.491	10.4238						7	42082.3	30.9429
		8	140.248	136.707	137.51	127.568	120.974	132.601						8	10.841	11.319	10.035	10.417	15.568	11.636						8	43479.9	31.9705
		9	124.144	124.144	120.234	78.617	90.562	107.54						9	13.359	12.977	11.696	13.75	11.258	12.608						9	38116.7	28.027
		10	115.881	154.223	137.523	135.925	117.334	132.177						10	10.541	14.796	10.035	10	10.291	11.1326						10	38120	28.0294
	2	1	248.949	194.954	227.123	198.51	186.078	211.123	158.194				4	1	7.169	6.719	8.79	6.834	7.083	7.319	8.44986				4	1	36297.4	26.6893	28.8288
		2	153.32	152.491	149.838	202.287	182.568	168.101						2	10.623	9.138	6.783	8.09	8.09	8.5448						2	39206.4	28.8283
		3	137.164	118.231	170.294	223.433	171.231	164.071						3	9.665	7.603	8.975	8.75	11.674	9.3334						3	45671	33.5816
		4	128.401	169.372	226.277	149.169	175.993	169.842						4	8.375	11.319	10.417	8.839	8.59	9.508						4	46924.7	34.5034
		5	204.359	168.682	165.355	145.919	177.518	172.367						5	5.433	4.583	5.833	4.249	5.833	5.1862						5	36667.2	26.9612
		6	160.078	169.806	163.31	193.685	143.713	166.118						6	7.096	7.512	5.27	5.48	6.374	6.3464						6	41734.7	30.6873
		7	86.321	66.719	54.804	106.888	80.147	78.9758						7	10.078	10.45	9.176	7.083	9.176	9.1926						7	31963.9	23.5029
		8	164.012	140.201	123.794	133.762	129.668	138.287						8	8.271	7.75	7.96	7.96	6.719	7.732						8	40896	30.0706
		9	149.206	170.701	138.644	187.196	180.432	165.236						9	12.43	11.859	11.524	13.744	11.38	12.1874						9	35045.8	25.769
		10	126.801	143.421	161.804	164.378	142.697	147.82						10	9.718	7.75	7.096	11.008	10.172	9.1488						10	37665.1	27.6949
	3	1	206.108	188.424	145.757	178.142	149.956	173.677	180.675				5	1	8.218	9.939	11.335	9.363	10.35	9.841	10.0575				5	1	47151.4	34.6701	32.8874
		2	145.643	158.649	232.457	167.881	181.709	177.268						2	10.291	10.249	11.932	11.464	8.79	10.5452						2	43592.4	32.0532
		3	209.158	178.701	161.17	215.883	189.506	190.884						3	9.904	10.069	10.45	8.385	9.619	9.6854						3	36133.9	26.569
		4	215.825	187.502	203.417	175.359	182.857	192.992						4	8.549	10.078	7.75	11.18	10.809	9.6732						4	40712.5	29.9357
		5	164.148	177.68	178.064	187.768	180.285	177.589						5	7.906	6.985	11.763	10.291	12.374	9.8638						5	38912	28.6118
		6	173.455	171.207	176.999	152.217	187.768	172.329						6	11.373	10.833	8.59	8.59	11.585	10.1942						6	44190.6	32.4931
		7	155.568	146.783	178.429	139.463	157.736	155.596						7	10.308	12.262	9.138	8.437	8.333	9.6956						7	50025.9	36.7837
		8	174.642	192.824	182.584	231.135	240.47	204.331						8	12.148	9.904	9.223	8.946	12.672	10.5786						8	52976	38.953
		9	193.513	163.626	186.147	188.108	228.371	191.953						9	11.032	9.4	9.223	11.997	8.207	9.9718						9	46492.9	34.1859
		10	195.025	167.701	152.4	170.018	165.534	170.136						10	8.907	11.335	13.392	10.905	8.09	10.5258						10	47080.9	34.6183
	4	1	145.833	142.743	154.349	130.171	139.326	142.484	146.362				6	1	6.719	8.385	9.718	9.014	9.878	8.7428	8.50358				6	1	43562.3	32.0311	31.1434
		2	142.969	118.662	145.538	129.384	138.757	135.062						2	8.839	7.906	8.498	11.733	11.441	9.6834						2	41516.7	30.527
		3	136.791	147.585	138.115	146.026	127.544	139.212						3	13.926	9.691	9.691	9.904	7.906	10.2236						3	47271.7	34.7586
		4	108.199	137.823	147.158	152.32	169.986	143.097						4	8.015	10.712	8.498	5.803	7.277	8.061						4	39883.2	29.3259
		5	104.947	104.669	120.012	123.564	101.82	111.002						5	11.696	7.277	5.966	10.138	9.4	8.8954						5	46168.2	33.9472
		6	149.25	139.608	168.236	199.757	210.655	173.501						6	8.015	6.731	9.138	9.138	8.76	8.3564						6	44269.3	32.5509
		7	102.879	147.158	180.956	173.305	175.129	155.885						7	5.606	4.859	6.25	5.221	4.167	5.2206						7	40979.2	30.1317
		8	130.451	143.343	130.267	188.792	206.87	159.945						8	7.5	10.308	9.138	8.333	7.603	8.5764						8	43725.3	32.151
		9	123.494	168.583	131.257	99.471	165.355	137.632						9	9.4	9.176	10.45	8.047	7.096	8.8338						9	38995.7	28.6733
		10	186.758	137.503	162.861	168.366	173.496	165.797						10	7.603	9.592	8.498	8.333	8.186	8.4424						10	37178.1	27.3369
	5	1	163.182	258.786	229.507	270.114	238.985	232.115	184.677				7	1	12.597	10.172	12.255	12.43	9.834	11.4576	9.81166				7	1	48455.6	35.6291	36.7655
		2	223.335	232.433	210.642	222.119	221.141	221.934						2	10.078	9.317	10.078	7.75	8.76	9.1966						2	50411.8	37.0675
		3	166.343	151.385	155.029	154.616	165.336	158.542						3	8.829	13.084	9.878	8.004	10.308	10.0206						3	50872	37.4059
		4	224.266	193.227	130.309	153	165.246	173.21						4	10.672	10.623	7.169	7.546	9.619	9.1258						4	45741	33.6331
		5	176.949	179.494	193.362	202.584	183.381	187.154						5	10.417	11.095	10.672	9.148	7.649	9.7962						5	58904.5	43.3121
		6	186.892	195.514	245.534	169.419	198.501	199.172						6	7.372	9.148	9.763	12.112	12.486	10.1762						6	58993.6	43.3776
		7	169.419	176.875	178.078	204.539	165.959	178.974						7	8.917	9.592	15.506	9.878	12.169	11.2124						7	54733.5	40.2452
		8	172.357	183.034	170.265	193.629	195.45	182.947						8	8.59	6.588	8.385	7.906	7.277	7.7492						8	39620.5	29.1327
		9	161.249	156.873	174.615	173.981	168.327	167.009						9	9.138	7.96	8.858	9.252	9.878	9.0172						9	43643.6	32.0909
		10	120.945	137.48	151.504	144.962	173.656	145.709						10	9.727	10.35	9.511	8.385	13.851	10.3648						10	48635.1	35.7611
	6	1	197.713	189.196	208.041	183.993	191.344	194.057	188.578			2 µg CPA/g egg	1	1	7.96	12.169	11.8	11	10.753	10.7364	9.21036	8.44238		2 µg CPA/g egg	1	1	36016.7	26.4828	26.1304	28.7205
		2	217.502	143.122	178.668	176.324	185.676	180.258						2	9.592	7.512	9.939	7.096	9.511	8.73						2	42595.1	31.32
		3	200.875	156.853	167.041	170.988	155.479	170.247						3	7.683	11.196	9.446	9.763	10.35	9.6876						3	34460.6	25.3387
		4	168.457	174.055	148.833	187.441	181.307	172.019						4	10.623	12.72	6.935	6.935	5.606	8.5638						4	40310.9	29.6404
		5	195.306	204.78	185.234	208.04	206.096	199.891						5	10.215	10.68	8.7	9.619	9.1	9.6628						5	29093.9	21.3926
		6	210.86	172.218	199.004	174.929	204.866	192.375						6	10.647	8.218	7.419	8.917	10.035	9.0472						6	29748.4	21.8739
		7	182.041	226.055	198.396	195.301	150.946	190.548						7	10.865	8.946	9.501	7.75	6.522	8.7168						7	31040.5	22.8239
		8	167.34	176.22	214.4	194.424	230.002	196.477						8	10.172	11.335	11.441	7.512	9.878	10.0676						8	34753.3	25.5539
		9	222.525	205.083	173.672	177.163	164.952	188.679						9	8.437	6.36	8.946	8.015	8.79	8.1096						9	38295.5	28.1584
		10	220.235	211.202	220.077	192.464	162.177	201.231						10	8.271	6.588	9.252	10.035	9.763	8.7818						10	39059	28.7199
	7	1	193.437	201.004	150.785	146.868	132.217	164.862	162.628				2	1	7.383	6.872	7.512	6.985	7.683	7.287	8.15656				2	1	38898.6	28.6019	26.3174
		2	290.092	227.855	198.791	203.309	187.62	221.533						2	7.512	7.383	9.754	9.583	10.417	8.9298						2	36041	26.5007
		3	161.163	185.826	175.127	147.904	116.696	157.343						3	11.071	10.45	8.375	9.204	10.069	9.8338						3	38962.2	28.6486
		4	82.668	76.399	78.546	89.077	79.451	81.2282						4	10.009	9.167	7.132	7.277	6.985	8.114						4	36989.2	27.198
		5	123.564	167.398	209.53	174.837	153.218	165.709						5	8.839	7.512	5.893	8.437	7.372	7.6106						5	35387.8	26.0205
		6	229.062	190.977	188.285	190.937	258.887	211.63						6	6.731	7.66	7.193	7.083	5.433	6.82						6	42845.1	31.5038
		7	162.703	157.449	182.912	191.037	172.733	173.367						7	7.083	5.417	10.607	6.834	11.524	8.293						7	28422.9	20.8992
		8	167.374	166.569	171.061	171.401	137.664	162.814						8	7.277	9.317	10.425	7.828	9.1	8.7894						8	37104.2	27.2825
		9	140.954	118.336	117.736	134.838	138.897	130.152						9	7.96	10	10.865	5.433	5	7.8516						9	28492.2	20.9501
		10	171.272	159.343	168.098	110.984	178.516	157.643						10	6.194	7.649	9.939	7.083	9.317	8.0364						10	34774	25.5691
	8	1	201.13	195.764	146.069	199.308	184.157	185.286	173.458				3	1	8.218	7.289	6.152	6.783	8.549	7.3982	9.56652				3	1	49868.1	36.6677	29.9299
		2	262.133	238.822	209.538	188.202	151.9	210.119						2	7.193	8.59	12.486	12.304	12.198	10.5542						2	29815.8	21.9234
		3	167.552	137.704	123.674	134.332	114.021	135.457						3	7.75	10.291	8.333	7.862	6.834	8.214						3	41996.4	30.8797
		4	146.52	156.846	126.453	148.392	152.673	146.177						4	6.719	9.252	10.078	7.603	7.512	8.2328						4	39556.2	29.0855
		5	208.041	194.743	171.472	167.798	181.401	184.691						5	14.536	13.044	11.219	8.218	10.249	11.4532						5	41301	30.3684
		6	157.22	150.197	144.138	160.488	124.167	147.242						6	9.138	7.828	9.363	9.014	7.169	8.5024						6	43045.8	31.6513
		7	175.373	150.861	156.6	153.851	158.395	159.016						7	9.014	8.271	6.935	10.146	9.511	8.7754						7	42739.8	31.4263
		8	169.142	193.61	194.745	170.335	156.134	176.793						8	9.592	12.7	9.727	10.017	8.59	10.1252						8	34434.7	25.3196
		9	219.561	223.801	254.429	142.753	260.867	220.282						9	13.706	13.077	11.18	9.52	11.763	11.8492						9	48378	35.572
		10	159.507	171.432	168.457	184.485	163.728	169.522						10	11.555	9.878	9.763	10.607	11	10.5606						10	35910.4	26.4047
	9	1	138.529	124.647	138.406	121.178	151.456	134.843	145.196				4	1	9.176	9.52	8.09	7.862	7.289	8.3874	6.83606				4	1	37597.9	27.6455	32.5044
		2	126.735	146.159	152.582	150.28	113.609	137.873						2	7.603	7.512	7.277	7.096	6.25	7.1476						2	40960.8	30.1182
		3	132.668	165.886	120.833	92.833	46.741	111.792						3	4.877	4.658	5.966	5.803	6.264	5.5136						3	45263	33.2816
		4	154.425	128.109	164.739	153	148.81	149.817						4	6.719	7.096	6.985	6.719	6.067	6.7172						4	48153.6	35.4071
		5	148.81	152.448	152.315	143.249	136.486	146.662						5	5.833	6.719	6.509	7.683	7.906	6.93						5	43118.7	31.705
		6	118.922	154.96	143.822	154.223	158.684	146.122						6	6.719	6.152	6.935	7.828	7.906	7.108						6	45063.5	33.135
		7	144.176	140.248	171.911	169.169	177.518	160.604						7	6.897	6.522	5.48	5.154	5.154	5.8414						7	45375.2	33.3641
		8	166.844	189.271	166.587	175.127	127.525	165.071						8	6.25	7.193	6.588	6.588	7.66	6.8558						8	42728.5	31.418
		9	142.724	136.555	137.568	144.419	119.91	136.235						9	6.783	6.468	5.803	6.731	7.12	6.581						9	48894.4	35.9518
		10	136.872	184.846	167.018	179.262	146.705	162.941						10	7.649	7.649	6.509	7.454	7.132	7.2786						10	44904	33.0176
	10	1	160.835	151.969	160.853	187.707	196.062	171.485	170.009			20 µg CPA/g egg	-	1	-	-	-	-	-	-	-	-		20 µg CPA/g egg	-	1	-	-	-	-
		2	141.912	149.56	139.054	178.934	176.875	157.267						2	-	-	-	-	-	-						2	-	-
		3	196.469	212.017	162.62	196.258	183.115	190.096						3	-	-	-	-	-	-						3	-	-
		4	233.222	187.973	165.546	188.58	185.144	192.093						4	-	-	-	-	-	-						4	-	-
		5	178.475	172.419	186.149	192.442	225.271	190.951						5	-	-	-	-	-	-						5	-	-
		6	91.473	95.819	137.48	162.297	170.986	131.611						6	-	-	-	-	-	-						6	-	-
		7	177.267	162.944	204.681	186.333	136.598	173.565						7	-	-	-	-	-	-						7	-	-
		8	182.589	197.993	196.322	189.101	197.15	192.631						8	-	-	-	-	-	-						8	-	-
		9	110.192	121.026	121.795	143.144	128.652	124.962						9	-	-	-	-	-	-						9	-	-
		10	186.656	155.253	178.094	191.299	165.852	175.431						10	-	-	-	-	-	-						10	-	-
	11	1	192.256	163.15	176.354	183.267	128.506	168.707	176.422
		2	195.509	165.959	178.405	169.757	146.107	171.147
		3	226.073	176.403	161.772	209.83	197.767	194.369
		4	228.485	159.208	195.066	165.5	153.374	180.327
		5	175.851	139.189	144.205	162.577	208.348	166.034
		6	127.72	164.524	188.518	152.684	183.455	163.38
		7	169.241	144.227	125.178	171.83	184.395	158.974
		8	158.552	144.176	205.835	143.372	182.53	166.893
		9	217.115	160.178	205.632	178.889	201.388	192.64
		10	235.914	229.336	205.198	163.276	175.018	201.748
2 µg CPA/g egg	1	1	132.796	91.363	129.585	121.249	149.176	124.834	112.277	131.7
		2	88.526	85.016	110.028	87.599	79.167	90.0672
		3	72.768	87.591	99.976	89.88	113.437	92.7304
		4	148.223	125.247	149.071	162.158	212.459	159.432
		5	92.195	112.339	127.544	164.012	207.138	140.646
		6	126.497	97.132	156.1	107.41	109.345	119.297
		7	88.898	47.617	139.017	175.667	181.066	126.453
		8	116.598	80.941	74.209	74.545	70.892	83.437
		9	86.863	88.898	105.211	86.811	102.774	94.1114
		10	81.735	83.537	111.268	99.624	82.668	91.7664
	2	1	98.46	96.699	96.756	89.853	117.05	99.7636	108.004
		2	70.317	94.637	125.593	135.902	143.219	113.934
		3	82.748	107.293	128.068	131.067	127.009	115.237
		4	81.181	101.67	112.355	126.711	98.072	103.998
		5	95.441	81.875	111.433	142.889	126.757	111.679
		6	95.79	122.545	122.443	141.814	131.962	122.911
		7	90.2	91.325	87.659	64.102	76.603	81.9778
		8	122.247	90.982	135.508	131.226	112.808	118.554
		9	90.2	90.94	88.333	130.557	110.912	102.188
		10	96.756	104.01	109.272	116.169	122.769	109.795
	3	1	192.101	174.716	174.551	150.224	156.465	169.611	174.818
		2	152.407	175.709	158.311	161.692	212.132	172.05
		3	191.851	178.8	157.167	182.515	196.704	181.407
		4	208.987	167.881	182.233	194.711	172.872	185.337
		5	117.645	112.651	85.85	121.94	130.812	113.78
		6	166.937	174.105	185.861	190.69	204.697	184.458
		7	196.073	178.732	214.717	279.137	286.586	231.049
		8	97.699	88.101	121.761	128.782	95.135	106.296
		9	169.222	206.189	196.541	232.528	210.8	203.056
		10	263.789	191.444	191.638	205.362	153.451	201.137
20 µg CPA/g egg	-	1	-	-	-	-	-	-	-	-
		2	-	-	-	-	-	-
		3	-	-	-	-	-	-
		4	-	-	-	-	-	-
		5	-	-	-	-	-	-
		6	-	-	-	-	-	-
		7	-	-	-	-	-	-
		8	-	-	-	-	-	-
		9	-	-	-	-	-	-
		10	-	-	-	-	-	-
[truncated: 20 more columns]

## Sheet: flutamide and p,p´-DDE
substance:	flutamide and p,p´-DDE											substance:	flutamide and p,p´-DDE											substance:	flutamide and p,p´-DDE							substance:	flutamide and p,p´-DDE						substance:	flutamide and p,p´-DDE
endpoint:	cortex thickness [µm]											endpoint:	cortex thickness [µm]											endpoint:	seminiferous tubules [%]		total area of picture=	136000	µm² = 100%			endpoint:	gonad surface area [mm²]						endpoint:	gonad surface area [mm²]
genetic sex:	female											genetic sex:	male											genetic sex:	male							genetic sex:	female						genetic sex:	male
test group	embryo no.	slice no.	values measured on slice [µm]					slice mean [µm]	embryo mean [µm]	group mean [µm]		test group	embryo no.	slice no.	measurements per slice [µm]					slice mean [µm]	embryo mean [µm]	group mean [µm]		test group	embryo no.	slice no.	slice mean [µm²]	slice mean [%]	embryo mean [%]	group mean [%]		test group	embryo no.	left ovary [mm²]	right ovary [mm²]	group mean left [mm²]	group mean right [mm²]		test group	embryo no.	left testis [mm²]	right testis [mm²]	group mean left [mm²]	group mean right [mm²]
			1	2	3	4	5								1	2	3	4	5
untreated control	1	1	234.6	194.12	208.72	204.98	229.55	214.394	170.385	162.642		untreated control	1	1	9.73	8.84	10.96	10.21	9.66	9.88	9.0742	10.7133		untreated control	1	1	37631.3	27.6701	32.0664	30.7039		untreated control	1	11.6794	1.72724	11.1657	2.26852		untreated control	1	4.20835	4.53774	4.74707	4.56331
		2	210.62	201.36	155.84	185.71	133.4	177.386						2	8.37	9.62	9.59	8.33	8.76	8.934						2	42487.8	31.2411					2	8.92617	1.89727					2	4.45482	4.4498
		3	177.3	192.94	146.26	170.74	124.66	162.38						3	8.43	8.43	8.91	10.01	8.91	8.938						3	41725.2	30.6803					3	9.08524	1.86302					3	5.24821	5.42323
		4	184.49	185.86	151.38	171.44	162.25	171.084						4	10.42	12.08	11.93	9.66	8.43	10.504						4	38622	28.3986					4	10.1793	3.06075					4	5.45079	4.24015
		5	184.67	217.51	190.47	167.81	124.64	177.02						5	9.58	9.59	8.75	8.84	9.66	9.284						5	45227.4	33.2554					5	11.2201	2.39335					5	4.37316	4.16563
		6	202.14	159.88	148.78	109.96	142.35	152.622						6	7.91	8.59	7.12	9.1	7.51	8.046						6	55000.4	40.4415					6	13.0244	2.81996				solvent control	1	3.67318	3.29202	3.53021	3.13366
		7	200.51	168.83	151.62	149.21	123.34	158.702						7	6.26	10.45	8.75	8.84	9.17	8.694						7	52898.7	38.8961					7	12.8873	2.31244					2	2.81388	2.36849
		8	163.51	132.63	131.07	155.38	90.34	134.586						8	8.84	8.33	11.25	8.59	7.96	8.994						8	40640.2	29.8825					8	11.678	2.09497					3	4.04733	4.15535
		9	194.18	184.65	185.67	127.72	177.65	173.974						9	9.2	11.12	8.5	7.28	8.79	8.978						9	41832.4	30.7591					9	11.8112	2.24769					4	3.58644	2.71877
		10	169.74	200.26	196.64	172.08	169.79	181.702						10	8.37	8.79	9.2	6.87	9.22	8.49						10	40037.1	29.439				solvent control	1	7.85155	1.87525	8.38809	1.90628		0.5 µg flutamide/g egg	1	3.79609	3.46489	3.86722	3.31137
	2	1	245.19	221.94	226.24	181.15	161.55	207.214	137.42				2	1	9.62	8.76	9.36	6.72	9.52	8.796	10.1788				2	1	43010.8	31.6256	31.2575				2	8.36623	2.33533					2	3.57595	3.40721
		2	258.23	232.12	159.87	151.85	138.01	188.016						2	11.32	7.6	11.93	13.31	14.77	11.786						2	36407.4	26.7701					3	8.90732	2.3562					3	4.22427	3.30001
		3	151.16	178.66	167.63	170.2	249.35	183.4						3	11.67	10.01	9.59	9.25	10.01	10.106						3	47122.7	34.649					4	8.75924	1.97179					4	1.6254	1.66017
		4	130	142.7	151.68	158.34	179.68	152.48						4	7.83	9.9	10.31	10.03	10.14	9.642						4	39211	28.8316					5	7.12544	1.16317					5	6.11437	4.72454
		5	124.7	107.27	124.12	203.94	263.48	164.702						5	10.62	12.17	10.35	14.24	13.85	12.246						5	37940.4	27.8974					6	9.57448	2.2661				5 µg flutamide/g egg	1	4.14203	3.57359	4.55847	4.04855
		6	84.58	93.78	101.61	125.28	106.07	102.264						6	8.21	10.29	11	9.36	10.82	9.936						6	39243.8	28.8557					7	8.7244	1.59344					2	4.25405	4.00222
		7	88.58	88.58	91.21	106.67	118.36	98.68						7	11.73	11.67	14.73	12.51	10.42	12.212						7	43320.9	31.8536					8	7.79609	1.68899					3	5.27932	4.56984
		8	71.67	103.34	85.2	90.04	86.03	87.256						8	7.55	9.18	9.32	10.84	9.32	9.242						8	46711.9	34.347				0.5 µg flutamide/g egg	1	6.7467	1.21587	7.79663	1.61837		50 µg flutamide/g egg	1	4.34328	3.92869	3.47507	2.78848
		9	80.42	91.03	89.4	80.09	115.08	91.204						9	8.19	10.03	9.36	8.5	9.1	9.036						9	45325.8	33.3278					2	8.25698	1.94276					2	2.81794	2.48508
		10	104.89	93.37	102.32	101.41	92.93	98.984						10	10.08	7.51	7.13	8.79	10.42	8.786						10	46807.4	34.4172					3	8.31272	1.47541					3	2.42569	1.98938
	3	1	141.04	155.68	166.82	159.77	185.27	161.716	159.709				3	1	9.14	10.62	9.59	12.11	9.45	10.182	10.168				3	1	31496.7	23.1594	30.3396				4	7.87012	1.83946					4	4.31337	2.75077
		2	161.39	157.04	163.41	165.87	187.53	167.048						2	13.55	7.17	8.33	8	7.75	8.96						2	44119	32.4404				5 µg flutamide/g egg	1	7.10173	2.02244	8.90074	1.91656		0.5 µg p,p´-DDE/g egg	1	5.42135	4.39181	4.5761	3.97476
		3	127.01	158.47	108.79	143.45	198.55	147.254						3	12.11	11.52	10.03	8.92	10.32	10.58						3	43109.1	31.6979					2	10.552	1.95847					2	5.07824	5.26559
		4	169.79	164.67	187.31	144.86	186.2	170.566						4	11.33	9.43	9.72	8.59	8.59	9.532						4	44500.2	32.7207					3	9.17629	2.43791					3	3.94106	3.26344
		5	119.19	121.95	137.51	152.45	202.56	146.732						5	10.62	9.25	13.18	11.52	8.55	10.624						5	36345	26.7243					4	9.19869	1.53719					4	3.45793	3.37856
		6	194.7	126.12	181.94	192.62	210.06	181.088						6	10.62	9.43	9.14	10.75	10.35	10.058						6	45080	33.147					5	8.47493	1.6268					5	3.93378	2.77679
		7	132.38	124.3	166.04	166.37	152.68	148.354						7	12.08	8.84	12.39	8.09	11.8	10.64						7	42014.1	30.8927				50 µg flutamide/g egg	1	9.8661	2.68189	10.1256	1.89244			6	5.62427	4.77235
		8	122.91	171.65	191.64	140.16	171.67	159.606						8	11.21	10.75	8.44	7.29	8.92	9.322						8	49639.9	36.4999					2	10.3851	1.103				5 µg p,p´-DDE/g egg	1	3.69271	3.65979	3.32393	2.93733
		9	145.32	139.09	129.37	158.37	207.18	155.866						9	10.21	10.31	11.28	11.73	10.87	10.88						9	36516.8	26.8506				0.5 µg p,p´-DDE/g egg	1	11.5157	1.23181	9.95123	1.46053			2	3.48251	2.58312
		10	150.78	166.39	160.55	123.09	193.51	158.864						10	11.94	9.36	10.29	11.55	11.37	10.902						10	39798.1	29.2633					2	10.8844	1.89987					3	2.62042	2.23195
	4	1	152.19	124.5	127.28	127.98	130.29	132.448	146.5				4	1	10.67	10.62	9.83	10.42	9.01	10.11	11.2564				4	1	39292.4	28.8915	28.5189				3	6.97708	1.10218					4	3.50007	3.27447
		2	148.79	154.43	131.56	136.53	133.19	140.9						2	11.93	10.08	13.29	8.95	9.75	10.8						2	42328	31.1235					4	11.2446	1.99908				50 µg p,p´-DDE/g egg	1	3.54426	3.22171	3.95141	3.41501
		3	127.28	143.9	128.1	132.52	118.44	130.048						3	12.37	15.26	12.37	9.72	9.25	11.794						3	37583.5	27.6349					5	9.13435	1.0697					2	3.82518	3.13875
		4	134.97	172.1	141.44	130.54	149.09	145.628						4	12.11	12.37	8.76	7.51	10.42	10.234						4	37697.6	27.7188				5 µg p,p´-DDE/g egg	1	8.48566	1.13189	10.1703	1.7896			3	5.40229	3.95065
		5	165.8	188.17	141.68	150.54	144.94	158.226						5	9.51	13.04	13.24	12.87	14.94	12.72						5	34499.5	25.3673					2	10.1191	2.36821					4	3.8205	3.48415
		6	151.7	150.67	152.02	141.22	98.39	138.8						6	12.25	10.65	8.59	11.33	10.29	10.622						6	34789.2	25.5803					3	10.5659	2.06106					5	3.58247	3.31774
		7	173.17	163.4	157.73	157.52	165.09	163.382						7	10.17	11.09	13.26	12.17	13.34	12.006						7	38814.9	28.5403					4	9.69056	1.99208					6	3.53378	3.37706
		8	111.38	121.39	140.56	178.66	106.6	131.718						8	10.29	10.52	10.62	8.95	11	10.276						8	44728.5	32.8886					5	11.1013	1.33956
		9	149.58	155.78	165.08	141.92	165.08	155.488						9	13.44	9.72	9.01	12.08	12.98	11.446						9	43221.9	31.7808					6	11.0593	1.84482
		10	170.59	169.85	181	167.31	153.05	168.36						10	9.45	13.88	13.85	12.08	13.52	12.556						10	34900.9	25.6624				50 µg p,p´-DDE/g egg	1	10.1512	2.64002	11.1103	2.43797
	5	1	190.58	194.7	214.4	175.96	125.9	180.308	144.196				5	1	10.02	11.18	13.24	12.49	12.13	11.812	12.889				5	1	45976.5	33.8062	31.3373				2	10.4282	1.65737
		2	148.64	144.17	130.32	127.72	190.88	148.346						2	12.75	12.43	11.84	10.09	10.32	11.486						2	45449	33.4183					3	12.7516	3.01653
		3	127.16	136.14	140.3	124.17	129.31	131.416						3	14.22	12.15	12.84	11.09	11.74	12.408						3	46573.4	34.2452
		4	143.04	122.49	117.24	167.86	158.85	141.896						4	12.09	10.01	12.11	14.01	9.17	11.478						4	49717.4	36.5569
		5	131.21	113.36	150.19	144.36	93.78	126.58						5	12.51	11.67	13.02	9.73	11.7	11.726						5	41225.6	30.3129
		6	143.74	88.58	102.16	200.25	138.49	134.644						6	15.66	17.52	14.73	10.21	9.58	13.54						6	37947	27.9022
		7	167.55	161.72	120.29	128.6	125.37	140.706						7	17.1	15.88	16.38	19.61	14.55	16.704						7	37516	27.5853
		8	114.53	157.56	202.5	166.11	200.31	168.202						8	13.18	10.67	15.17	11.22	13.65	12.778						8	37114.2	27.2899
		9	118.36	154.31	158.65	130.17	140.11	140.32						9	15.17	15.02	12.15	14.8	11	13.628						9	43130.6	31.7137
		10	136.2	156.81	141.09	124.81	88.78	129.538						10	11.92	14.34	11.21	14.01	15.17	13.33						10	41537.4	30.5422
	6	1	237.83	272.95	186.24	146.74	165.84	201.92	192.345			solvent control	1	1	12.67	13.85	10.62	13.31	15.48	13.186	11.9982	10.5923		solvent control	1	1	56110.8	41.258	35.5413	32.3053
		2	158.2	129.44	123.45	114.7	152.56	135.67						2	12.49	10.83	10.68	13.85	14.78	12.526						2	56041.8	41.2072
		3	143.07	134.49	123.95	152.98	141.92	139.282						3	13.02	12.26	8.84	7.96	10.68	10.552						3	40180.1	29.5442
		4	239.31	196.83	116.39	103.67	242.22	179.684						4	13.18	16.21	17	22	18.84	17.446						4	46165.7	33.9454
		5	163.18	214.17	255.96	277.68	338.76	249.95						5	15.77	12.84	12	14.55	12.25	13.482						5	43757.5	32.1746
		6	128.63	223.4	244.13	289.96	292.19	235.662						6	8.3	9.36	13.85	11.32	11.37	10.84						6	46249.9	34.0073
		7	145.99	91	161	196.9	207.73	160.524						7	8.44	9.22	13.18	8.59	9.62	9.81						7	49571.2	36.4494
		8	158.14	170.59	198.78	163.34	231.24	184.418						8	7.51	8.99	8.01	8.3	8.43	8.248						8	47201.6	34.7071
		9	236.36	259.97	215.26	208.72	177.23	219.508						9	14.01	11.2	10.91	12.84	9.59	11.71						9	47506.2	34.931
		10	174.17	191.3	251.56	192.19	274.96	216.836						10	14.91	14	12.25	10.03	9.72	12.182						10	50576.7	37.1888
	7	1	155.38	195.28	218.97	329.32	280.28	235.846	202.431				2	1	9.58	9.59	9.18	9.32	9.2	9.374	9.821				2	1	46703.1	34.3405	29.1928
		2	167.51	167.5	182.69	250.87	254.17	204.548						2	13.18	12.78	10.65	8.95	8.95	10.902						2	38250.7	28.1255
		3	162.55	169.22	192.62	274.17	291.67	218.046						3	7.13	10.62	8.79	8.5	8.79	8.766						3	47717.7	35.0866
		4	119.73	137.68	227.11	136.03	125.84	149.278						4	10.08	9.58	10.08	10.08	10.83	10.13						4	35173.8	25.8631
		5	112.18	118.98	128.97	158.09	126.83	129.01						5	11.18	11.93	10.35	11.21	10.44	11.022						5	39948.4	29.3738
		6	119.74	131.18	133.53	142.77	129.02	131.248						6	10.67	8.95	8.86	7.51	10.55	9.308						6	36723.2	27.0023
		7	150	157.64	118.19	109.87	100.78	127.296						7	7.93	13.02	8.79	12.6	13.79	11.226						7	40244.8	29.5918
		8	151.78	270.87	284.83	289.33	335.83	266.528						8	7.68	8.5	8.37	8.09	8.33	8.194						8	37158.2	27.3222
		9	325.82	226.69	241.7	326.26	339.74	292.042						9	7.92	8.34	6.72	8.79	9.32	8.218						9	36686.6	26.9755
		10	196.49	387.66	260.53	180.4	327.24	270.464						10	11.03	12.92	10.83	11.37	9.2	11.07						10	38416	28.247
	8	1	234.82	180.84	181.18	147.25	142.38	177.294	148.147				3	1	13.34	10.54	10.54	9.62	10.71	10.95	11.447				3	1	38379.3	28.2201	30.4766
		2	187	220.78	136.39	116.06	159.75	163.996						2	11.22	10.87	12.37	8.79	8.22	10.294						2	41840.7	30.7652
		3	226.2	157.34	123.19	143.72	118.56	153.802						3	10.65	10.87	10.52	10.29	12.02	10.87						3	42335.2	31.1288
		4	203.72	139.64	136.88	128.06	136.15	148.89						4	8.98	10.68	10.15	13.08	11.46	10.87						4	43184.6	31.7534
		5	140.18	139.17	131.34	139.39	134.04	136.824						5	9.62	11.01	8.44	8.95	11.07	9.818						5	40151.8	29.5234
		6	142.91	168.97	115.05	130.89	135.82	138.728						6	13.85	14.49	14.65	14.26	16.27	14.704						6	42650.7	31.3608
		7	124.87	129.37	129.53	114.33	139.14	127.448						7	12.72	8.55	8.5	9.32	9.81	9.78						7	41464.1	30.4883
		8	190.22	143.83	150.06	125.84	104.52	142.894						8	12.39	12.53	9.4	11.62	8.84	10.956						8	45107.6	33.1674
		9	121.25	125.91	125.06	168.53	149.5	138.05						9	13.76	13.97	19.94	14.73	14.17	15.314						9	42585.5	31.3129
		10	153.32	114.47	151.78	171.38	176.78	153.546						10	10.01	13.46	10.67	11.18	9.25	10.914						10	36782	27.0456
solvent control	1	1	141.13	158.38	160.87	159.38	152.97	154.546	158.152	151.184			4	1	9.14	9.9	8.3	9.1	9.52	9.192	9.103				4	1	46201.3	33.9715	34.0104
		2	157.61	117.09	152.5	180.19	138.49	149.176						2	7.91	8.83	9.14	9.51	11.94	9.466						2	45401.5	33.3834
		3	164.54	213.28	128.38	170.47	123.47	160.028						3	10.45	10.62	10.42	10.45	11.93	10.774						3	44401.9	32.6485
		4	113.77	160.84	145.84	157.51	150	145.592						4	8.44	10.29	8.59	8.79	9.88	9.198						4	48109.8	35.3748
		5	152.61	173.38	172.57	188.36	166.76	170.736						5	9.01	8.01	7.29	9.01	10.52	8.768						5	44820.5	32.9562
		6	143.66	141.21	147.95	147.43	183.61	152.772						6	8.95	8.39	11.01	7.28	7.65	8.656						6	50700.6	37.2799
		7	160.42	163.94	118.68	127.36	146.78	143.436						7	6.52	7.66	8.44	7.1	9.18	7.78						7	40711.6	29.935
		8	161.09	160.85	114.55	152.15	181.6	154.048						8	7.45	8.01	9.72	8.44	8.67	8.458						8	50336.7	37.0123
		9	159.72	191.8	141.31	123.92	172.63	157.876						9	6.72	7.29	8.76	9.88	9.72	8.474						9	47638.8	35.0285
		10	236.5	203.19	118.13	161.12	247.6	193.308						10	9.01	10.65	9.59	10.87	11.2	10.264						10	44219	32.514
	2	1	112.26	111.02	110.95	110.81	91.66	107.34	138.577			0.5 µg flutamide/g egg	1	1	11.62	8.21	10.45	9.22	7.12	9.324	10.9568	10.8094		0.5 µg flutamide/g egg	1	1	41914.8	30.8197	31.3798	32.2984
		2	133.2	125.07	118.86	142.02	148.22	133.474						2	10.42	13.29	11.67	9.83	12.67	11.576						2	45547.1	33.4905
		3	143.37	105.41	124.51	121.58	161.12	131.198						3	11.26	9.5	9.43	9.83	9.18	9.84						3	55625.2	40.9009
		4	160.69	134.18	120.91	138.29	136.03	138.02						4	10.62	11	10.25	10.65	8.67	10.238						4	52286.3	38.4458
		5	170.14	167.94	160.7	133.45	153.94	157.234						5	9.51	11.79	12.6	10.42	11.55	11.174						5	35982	26.4574
		6	146.78	125.17	153.74	144.5	136.21	141.28						6	11.55	8.44	10.54	9.9	8.79	9.844						6	35648.3	26.212
		7	149.31	137.49	135.9	148.49	148.22	143.882						7	15.17	12.15	12.49	10.29	9.15	11.85						7	39489.2	29.0362
		8	129.67	129.76	141.25	156.36	150.71	141.55						8	13.24	10.54	11.52	13.04	10.65	11.798						8	37400.1	27.5001
		9	131.08	129.77	144.72	151.31	152.43	141.862						9	12.15	10.08	10.91	14.45	15.17	12.552						9	40423.2	29.7229
		10	154.35	135.44	149.85	154.64	155.36	149.928						10	12.49	10.94	10.62	11.26	11.55	11.372						10	42448.5	31.2121
	3	1	177.47	168.65	158.44	144.47	138.83	157.572	142.051				2	1	12.53	13.24	5.43	7.28	7.19	9.134	10.6826				2	1	47562.7	34.9726	31.1932
		2	150.92	189.39	137.18	137.52	134.34	149.87						2	10.68	13.52	11.38	11.52	11.12	11.644						2	49848.1	36.653
		3	155.36	172.42	136.66	145.09	171.8	156.266						3	8.99	8.44	7.08	9.69	11.79	9.198						3	49386.2	36.3134
		4	124.92	170.02	144.51	120.74	150.67	142.172						4	11	11.79	10.71	10.08	12.53	11.222						4	38056.1	27.9824
		5	133.44	171.71	138.46	137.85	139.41	144.174						5	12.11	12.11	12.09	9.58	13.75	11.928						5	41048.7	30.1829
		6	110.81	109.26	179.85	150.67	134.43	137.004						6	14.73	13.24	11.03	11.67	10.83	12.3						6	43566.9	32.0345
		7	148.16	169.24	116.08	137.77	132.38	140.726						7	10.31	7.6	10.42	11.26	9.18	9.754						7	37468.3	27.5502
		8	121.12	135.37	129.21	125.8	114.81	125.262						8	11.12	10.14	10.87	9.18	9.58	10.178						8	38546.3	28.3429
		9	124.14	125.61	130.89	136.71	138.82	131.234						9	12.67	11.37	10.31	9.2	10.49	10.808						9	40348.1	29.6677
		10	136.8	140.88	117.1	111.54	174.84	136.232						10	10.62	10.82	11.44	11.32	9.1	10.66						10	38396.9	28.233
	4	1	156.34	202.18	181.32	146.5	146.77	166.622	130.151				3	1	9.17	11.16	7.85	9.65	10.36	9.638	10.6128				3	1	43265	31.8125	31.5764
		2	180.56	155.63	151.85	178.52	117.8	156.872						2	11.6	13.05	9.93	11.23	11.57	11.476						2	38328.3	28.1826
		3	141.35	108.89	120.14	179.15	86.96	127.298						3	12.03	15.16	11.6	10.46	10.05	11.86						3	39152.2	28.7884
		4	98.52	93.85	127.63	163.23	177.01	132.048						4	11.16	9.51	11.53	11.03	10.85	10.816						4	47076.5	34.6151
		5	109.57	108.41	80.9	134.05	80.62	102.71						5	10.33	9.42	9.65	11.28	11.64	10.464						5	37491.8	27.5675
		6	105.49	125.68	131.34	119.74	103.08	117.066						6	12.42	10.81	10.46	9.1	12.03	10.964						6	46438	34.1456
		7	117.26	145.51	150.98	141.87	108.17	132.758						7	10.21	10.13	10.45	9.17	9.93	9.978						7	40343.1	29.6641
		8	112.67	135.71	154.2	169.86	124.01	139.29						8	9.99	9.5	9.99	13.23	12.46	11.034						8	44875.2	32.9964
		9	127.9	77.79	126.69	142.55	105.03	115.992						9	10.87	10.36	9.95	9.54	7.13	9.57						9	45518	33.4691
		10	98.55	78.55	123.74	127.3	126.12	110.852						10	10.34	11.43	10.87	9.58	9.42	10.328						10	46950.7	34.5226
	5	1	167.07	164.41	153.56	140.48	148.37	154.778	174.191				4	1	9.59	12.26	9.73	8.84	10.14	10.112	10.9852				4	1	44980.5	33.0739	35.0442
		2	172.21	160.63	196.31	223.47	145.93	179.71						2	14.37	11.32	10.87	9.59	11.67	11.564						2	37206	27.3574
		3	205.01	182.91	215.57	208	98.89	182.076						3	10.42	9.62	12.67	11.26	9.73	10.74						3	44280.1	32.5589
		4	196.93	156.79	173.4	171.59	229.72	185.686						4	12.65	14.46	10.08	11.93	9.5	11.724						4	54172.9	39.833
		5	198.84	185.25	147.21	253.33	166.1	190.146						5	11.73	15.87	15.44	11.28	14.46	13.756						5	46060.1	33.8677
		6	208.7	201.42	215.83	153.15	109.37	177.694						6	16.23	12.86	13.46	10.84	8.37	12.352						6	44222.6	32.5166
		7	166.24	168.21	174.75	178.47	140.39	165.612						7	8.44	9.36	8.67	9.15	7.91	8.706						7	40773	29.9801
		8	181.34	172.93	192.69	175.71	160.09	176.552						8	10.87	10	10.96	10.91	10.42	10.632						8	51095.7	37.5703
		9	206.32	174.68	168.34	236.68	270.72	211.348						9	11.73	11.07	10.03	12	8.59	10.684						9	55180	40.5736
		10	152.19	158.51	93.9	83.87	103.09	118.312						10	11.67	12.11	8.7	7.38	8.05	9.582						10	58630.5	43.1106
	6	1	118.63	83.41	100.37	117.64	129.44	109.898	134.982			5 µg flutamide/g egg	1	1	5.76	8.52	9.61	5.44	7.69	7.404	9.1346	10.0013		5 µg flutamide/g egg	1	1	36910.4	27.14	29.4136	28.0798
		2	144.21	115.26	93.65	79.6	132.2	112.984						2	9.5	7.62	7.22	8.37	7.07	7.956						2	50609	37.2125
		3	163.52	147.43	128.79	119.35	99.23	131.664						3	9.58	9.58	8.02	8.37	8.69	8.848						3	38195.5	28.0849
		4	155.63	156.6	130.97	76.83	108.66	125.738						4	9.15	5.76	7.13	6.66	7.85	7.31						4	41806.7	30.7402
		5	189.01	169.22	155.84	118.9	105.63	147.72						5	6.2	8.77	10.4	9.8	5.8	8.194						5	35515.5	26.1143
		6	171.67	175.23	163.72	156.75	130.75	159.624						6	7.89	9.24	11.83	10.91	7.6	9.494						6	35914.8	26.4079
		7	135.31	177.49	159.92	142.07	147.69	152.496						7	10.13	10.05	9.06	7.62	9.32	9.236						7	34537.5	25.3952
		8	108.59	155.11	153.99	143.42	141.08	140.438						8	11.03	8.37	8.51	11.67	11.9	10.296						8	37717.9	27.7338
		9	132.88	155.38	152.83	135	130.04	141.226						9	10.21	11.03	10.21	9.82	10.05	10.264						9	42676.2	31.3795
		10	124.55	126.18	140.72	123.44	125.28	128.034						10	11.69	13.94	11.35	12.59	12.15	12.344						10	46141.6	33.9276
	7	1	193.44	197.7	227.87	227.18	214.75	212.188	180.184				2	1	13.24	12.2	13.76	11.32	13.39	12.782	10.6946				2	1	36306.1	26.6957	32.6923
		2	283.06	185.86	126.72	224.09	221.34	208.214						2	11.93	10.42	12.08	11.26	12.08	11.554						2	44594.7	32.7902
		3	212.5	186.57	154.67	261.94	210.95	205.326						3	11.93	9.9	8.84	12.67	8.76	10.42						3	33061.7	24.3101
		4	235.38	220.16	183.43	192.32	161.46	198.55						4	10.42	11.32	8.99	10.14	10.14	10.202						4	37806.5	27.7989
		5	252.55	219.13	189.77	218.93	176.34	211.344						5	11.58	13.62	13.24	14.65	12.34	13.086						5	53075.9	39.0264
		6	139.19	186.89	183.44	210	221.32	188.168						6	11.33	9.66	10.84	9.17	10.01	10.202						6	47192.5	34.7004
		7	111.18	118.4	93.93	140.84	150.79	123.028						7	9.2	7.92	9.66	10.55	10.83	9.632						7	54976.3	40.4238
		8	117.24	150.78	192.82	191.98	179.63	166.49						8	13.34	11.7	9.32	9.4	9.59	10.67						8	43288.3	31.8296
		9	123.49	161.35	155.65	157.01	149.47	149.394						9	9.18	8.33	11.28	8.19	8.01	8.998						9	46766.4	34.3871
		10	114.9	99.88	143.92	153.85	183.12	139.134						10	10.42	11.7	8.33	6.93	9.62	9.4						10	47546.8	34.9609
0.5 µg flutamide/g egg	1	1	143.18	131.09	140.27	172.18	163.32	150.008	138.298	144.426			3	1	12.51	8.91	9.59	9.22	11.07	10.26	10.1748				3	1	23347.6	17.1673	22.1336
		2	159.29	123.77	156.46	93.01	104.89	127.484						2	11.73	9.5	12.43	11.44	10.71	11.162						2	27514	20.2309
		3	139.07	114.12	108.68	95	88.25	109.024						3	11.03	10.07	8.59	9.32	12.98	10.398						3	33635.2	24.7318
		4	176.65	151.12	138.41	145.93	117.83	145.988						4	11.22	10.08	10.44	13.02	9.81	10.914						4	29206	21.475
		5	182.6	130.15	143.49	116.85	120.7	138.758						5	10.71	7.91	7.91	8.05	8.59	8.634						5	30921.7	22.7365
		6	108.86	146.67	156.22	142.06	141.09	138.98						6	12.15	10.07	9.15	11.22	10.62	10.642						6	32139.1	23.6317
		7	116.03	192.01	223.52	163.94	147.63	168.626						7	13.08	12.31	9.59	8.95	10.03	10.792						7	32640.2	24.0001
		8	110.34	103.47	107.12	143.55	210.6	135.016						8	11.49	9.18	10.02	9.32	9.01	9.804						8	29734.5	21.8636
		9	143.19	132.48	118.5	110.02	100.17	120.872						9	11.92	9.25	8.33	11.2	9.45	10.03						9	32469.2	23.8744
		10	143.48	158.76	176.31	136.14	126.43	148.224						10	10.29	10.87	8.09	9.72	6.59	9.112						10	29410	21.625
	2	1	152.54	125.38	136.21	164.56	177.6	151.258	121.556			50 µg flutamide/g egg	1	1	9.24	9.67	9.29	13.59	8.14	9.986	9.4346	10.3933		50 µg flutamide/g egg	1	1	48698.9	35.808	26.7286	29.2018
		2	128.38	153.01	119.54	151.75	150.45	140.626						2	7.98	8.37	7.07	6.61	9.92	7.99						2	47773.8	35.1278
		3	132.42	164.35	94.29	114.79	130.84	127.338						3	10.33	13.64	12.51	15.53	12.29	12.86						3	29805.3	21.9156
		4	125.38	128.28	93.59	99.52	98	108.954						4	10.54	10.81	10.34	11.16	11	10.77						4	24663.2	18.1347
		5	79.9	105.48	105.95	77.5	131.79	100.124						5	8.37	7.62	7.39	8.69	8.23	8.06						5	36505.8	26.8425
		6	134.18	122.62	85.8	102.91	107.71	110.644						6	9.61	8.63	7.48	7.72	7.98	8.284						6	33554.2	24.6722
		7	126.74	115	143.01	150.48	109.93	129.032						7	6.66	7.76	7.76	7.48	9.1	7.752						7	29615	21.7757
		8	145	156.3	124.55	95.05	112.63	126.706						8	9.1	7.13	7.84	8.69	7.45	8.042						8	39786.3	29.2546
		9	99.88	101.09	124.2	76.49	97.3	99.792						9	8.72	10.94	10.06	10.06	9.13	9.782						9	38607.4	28.3878
		10	114.12	145.96	143.11	104.76	97.5	121.09						10	11.23	11.69	11.28	11.64	8.26	10.82						10	34498.7	25.3667
	3	1	280.96	214.59	208.71	234.48	142.37	216.222	155.792				2	1	7.45	9.92	10.33	11.16	11.98	10.168	11.143				2	1	55343.1	40.6935	36.604
		2	217.97	160.85	196.44	270.72	221.56	213.508						2	11.43	10.78	9.95	9.1	12.98	10.848						2	51561.4	37.9128
		3	180.84	147.01	203.31	197.07	204.85	186.616						3	9.93	10.73	8.69	11.23	12.1	10.536						3	53346.3	39.2252
		4	146.75	153.66	145.79	101.11	132.8	136.022						4	9.93	9.1	12.42	11.16	9.95	10.512						4	48958.7	35.999
		5	166.45	128.95	129.62	132.6	115.08	134.54						5	11.35	9.92	8.68	11.16	12.4	10.702						5	42482.4	31.237
		6	161.78	192.62	174.72	125.39	124.44	155.79						6	12.05	10.4	9.51	9.92	8.68	10.112						6	53103.4	39.0466
		7	134.38	155.84	173.41	150.11	159.2	154.588						7	8.83	10.22	12.05	12.24	13.25	11.318						7	49371.8	36.3028
		8	127.63	150.75	118.83	124.32	110.65	126.436						8	14.87	12.92	12.09	12.94	8.5	12.264						8	48579.3	35.7201
		9	112.75	101.89	102.51	141.73	125.54	116.884						9	13.57	11.38	12.25	15.56	19.27	14.406						9	39396.1	28.9677
		10	86.99	109.37	127.16	152.15	110.91	117.316						10	8.91	9.9	10.29	14.32	9.4	10.564						10	55672.1	40.9353
	4	1	144.96	149.91	175.25	177.05	188.64	167.162	162.055				3	1	11.7	9.62	9.32	12.03	10.29	10.592	10.311				3	1	31164.8	22.9153	21.4899
		2	172.89	175.04	191.63	212.92	200.17	190.53						2	10.42	10.62	12.25	8	7.66	9.79						2	26270.5	19.3165
		3	112.58	110.38	136.33	162.86	154.67	135.364						3	7.51	9.18	12.15	10.82	7.51	9.434						3	31820.2	23.3972
		4	164.71	149.09	167.97	191.71	181.71	171.038						4	8.75	9.2	5.02	9.73	8.91	8.322						4	34629.9	25.4632
		5	139.14	145.03	158.76	181.6	152.25	155.356						5	9.66	8.99	7.38	8.44	6.35	8.164						5	34085.9	25.0631
		6	165.85	162.81	155.98	163.64	171.91	164.038						6	11.74	13.62	10.44	13.45	12.5	12.35						6	25432.5	18.7003
		7	138.37	145.22	161.69	150.33	158.89	150.9						7	10.87	10.96	12.92	11.18	9.83	11.152						7	24757.7	18.2042
		8	-	-	-	-	-	-						8	10.84	10.01	12.03	10.84	9.73	10.69						8	28180.1	20.7207
		9	-	-	-	-	-	-						9	11.44	12.2	10.45	9.58	10.65	10.864						9	28014.2	20.5987
		10	-	-	-	-	-	-						10	12.56	15.28	10.01	8.76	12.15	11.752						10	27906.9	20.5198
5 µg flutamide/g egg	1	1	197.97	162.99	177.38	218.12	163	183.892	129.816	130.37			4	1	10.91	12.94	10	7.93	8.99	10.154	10.6848				4	1	47254.3	34.7458	31.9847
		2	152.18	176.66	175.53	151.73	188.82	168.984						2	11	10.01	10.31	11.52	10.83	10.734						2	44198.1	32.4986
		3	135.58	166.18	141.47	141.1	181.19	153.104						3	7.91	11.38	9.22	9.1	10.82	9.686						3	47504.2	34.9295
		4	114.31	128.45	122.88	138.56	114.43	123.726						4	7.96	12.94	11.44	10.31	9.4	10.41						4	32020.5	23.5445
		5	115.89	93.69	135.26	140.7	151.58	127.424						5	9.14	7.29	9.18	12.17	7.66	9.088						5	49013.9	36.0396
		6	97.55	92.38	120.98	116.54	118.65	109.22						6	10.14	11.79	10.45	9.32	8.7	10.08						6	33397.6	24.557
		7	111.29	100.74	112.32	102.24	113.8	108.078						7	10.44	10.62	8.55	9.43	9.5	9.708						7	47733.9	35.0985
		8	99.03	84.54	88.8	91.29	111.05	94.942						8	13.02	14.46	13.97	12.94	12.94	13.466						8	43116.5	31.7033
		9	92.68	140.55	128.76	94.74	92.85	109.916						9	11.93	11.07	14.74	9.14	11.49	11.674						9	39850.7	29.302
		10	127.61	132.72	116.14	108.79	109.12	118.876						10	14.68	13.08	14.14	7.75	9.59	11.848						10	50902.2	37.4281
	2	1	168.45	221.5	138.57	130.05	165.46	164.806	147.746			0.5 µg p,p´-DDE/g egg	1	1	12.03	7.51	7.75	8.91	10.52	9.344	10.0074	10.1014		0.5 µg p,p´-DDE/g egg	1	1	56010.8	41.1844	34.4897	32.242
		2	96.51	173.33	153.53	178.34	195.87	159.516						2	9.73	7.78	9.32	8.25	9.72	8.96						2	44334	32.5986
		3	127.75	130.18	120.75	135.7	128.83	128.642						3	8.76	10.44	10.81	10.62	9.94	10.114						3	45157.4	33.204
		4	158.77	140.8	149.39	177.26	150.45	155.334						4	11.92	11.37	11.18	10.52	8.86	10.77						4	39376	28.9529
		5	107.72	113.11	154.86	132	115.4	124.618						5	9.76	10.09	7.66	8.79	6.01	8.462						5	46318.1	34.0575
		6	154.47	152.92	152.01	124.05	128.07	142.304						6	8.84	10.17	7.96	9.18	9.59	9.148						6	54467.6	40.0497
		7	144.89	144.21	139.53	171.05	147.62	149.46						7	11.79	8.95	9.51	9.62	10.84	10.142						7	46543.4	34.2231
		8	155.29	124.05	167.76	124.96	181.34	150.68						8	10.25	11.37	8.39	9.83	8.58	9.684						8	46145.8	33.9307
		9	143.78	170.81	128.74	175.8	156.51	155.128						9	11.52	13.6	9.52	12.86	9.36	11.372						9	42687.1	31.3876
		10	139.71	137.2	148.02	131.63	178.28	146.968						10	11.52	12.3	12.53	12.25	11.79	12.078						10	48019.8	35.3087
	3	1	128.58	112.78	105.1	130.24	100.59	115.458	120.327				2	1	10.08	10.96	7.91	11.25	13.33	10.706	11.4602				2	1	41136.2	30.2472	28.0811
		2	125.17	109.05	103.98	112.56	116.53	113.458						2	11.67	10.42	11.26	10.31	10.02	10.736						2	43174.8	31.7462
		3	103.99	101.71	105.41	147.56	129.17	117.568						3	14.65	14.24	12.34	11.93	13.85	13.402						3	40649.6	29.8894
		4	104.2	87.34	112.67	151.42	149.2	120.966						4	9.73	11.7	8.5	9.25	11.73	10.182						4	36956.9	27.1742
		5	102.77	121.95	171.8	159.43	147.74	140.738						5	12.84	9.66	11.22	11.22	12.15	11.418						5	34447.6	25.3291
		6	84.86	101.67	150.95	164.3	138.27	128.01						6	11.52	13.91	11.73	10.08	11.93	11.834						6	40131	29.5081
		7	58.71	60.05	65.85	66.71	117.53	73.77						7	15.46	13.02	13.08	10.84	12.03	12.886						7	42859	31.514
		8	86.32	75.67	77.72	69.21	144.18	90.62						8	11.93	11.22	9.9	11.46	8.7	10.642						8	32137.7	23.6306
		9	138.21	112.56	121.8	155.22	186.76	142.91						9	11.22	12.25	13.57	10.54	10.68	11.652						9	29657	21.8066
		10	238.07	170.1	140.01	137.24	113.44	159.772						10	10.21	10.87	11.79	11.12	11.73	11.144						10	40752.9	29.9654
	4	1	184.87	146.32	132.23	201.66	152.25	163.466	126.44				3	1	13.85	14.17	12.11	14.65	10.71	13.098	10.2918				3	1	42192.1	31.0236	32.4646
		2	118.08	119.91	132.76	155.81	193.18	143.948						2	11.94	8.98	11.22	10.42	11.07	10.726						2	46613.9	34.2749
		3	133.61	119	93.56	121.34	172.61	128.024						3	13.57	8.95	11.74	8.05	6.01	9.664						3	37352.3	27.465
		4	147.48	123.59	117.92	134.99	103.98	125.592						4	12.13	11.38	11.01	10.68	8.22	10.684						4	48425.2	35.6068
		5	138.99	119.17	103.95	125.55	133.14	124.16						5	8.05	8.59	7.38	10.42	9.2	8.728						5	45692.3	33.5973
		6	110.81	100.18	138.66	128.43	101.33	115.882						6	11.86	6.98	9.14	10.83	10.83	9.928						6	46821.4	34.4275
		7	144.35	98.58	92.02	115.62	124.11	114.936						7	10.94	8.76	10.29	10.81	9.88	10.136						7	35339.4	25.9849
		8	114.19	143.34	144.32	131	115.03	129.576						8	9.75	12.39	12.49	9.75	11.79	11.234						8	39084.8	28.7388
		9	123.58	101.52	109.5	116.59	152.97	120.832						9	7.68	9.9	9.22	7.78	10.68	9.052						9	45179.5	33.2202
		10	104.2	97.51	109.17	86.17	92.86	97.982						10	9.36	11.18	10.07	8.58	9.15	9.668						10	54817.5	40.307
	5	1	233.73	225.64	194.09	167.34	163.96	196.952	127.522				4	1	8.59	10.29	10.08	8.05	6.67	8.736	8.6462				4	1	35200.4	25.8827	33.9326
		2	192.3	204.97	164.91	143.78	162.56	173.704						2	12.53	8.99	8.79	5.43	5.48	8.244						2	45563	33.5022
		3	123.63	191.97	159.19	140.97	120.91	147.334						3	8.43	5.67	4.75	7.51	7.38	6.748						3	44975.8	33.0704
		4	118.51	131.95	116.68	125.51	109.25	120.38						4	8.34	9.59	8.79	10.44	6.31	8.694						4	55266.4	40.6371
		5	126.36	132.31	127.37	103.61	101.72	118.274						5	6.25	7.08	10.03	10.55	8.91	8.564						5	45013.3	33.098
		6	121.94	113.8	107.78	113.67	119.12	115.262						6	9.59	11.37	10.87	8.84	11.52	10.438						6	48830.6	35.9048
		7	98.42	99.36	113.38	93.92	122.12	105.44						7	11.52	12.51	12.11	11.25	11.28	11.734						7	45088.4	33.1532
		8	101.98	78.32	104.3	92.23	111.73	97.712						8	8.19	7.51	9.32	8.99	8.33	8.468						8	38015.9	27.9529
		9	106.05	100.35	122.57	128.14	127.3	116.882						9	10.03	8.34	7.1	10.49	8.83	8.958						9	49240.7	36.2064
		10	69.73	75.98	69.71	91.72	109.25	83.278						10	6.37	6.37	6.15	5.02	5.48	5.878						10	54288.5	39.918
50 µg flutamide/g egg	1	1	156.77	136.68	118.39	128.79	123.65	132.856	138.084	124.622		5 µg p,p´-DDE/g egg	1	1	7.93	9.5	9.22	9.9	8.3	8.97	9.4018	9.8362		5 µg p,p´-DDE/g egg	1	1	50976.5	37.4827	34.9167	30.4497
		2	164.65	152.78	156.41	140.39	122.06	147.258						2	9.5	9.22	9.9	10.62	10.15	9.878						2	50308.3	36.9914
		3	152.83	105.42	65.78	62.78	72	91.762						3	9.32	8.59	7.28	7.91	9.22	8.464						3	50735.5	37.3055
		4	145.29	150.37	157.38	150.01	141.23	148.856						4	6.87	8.99	9.9	11.46	9.22	9.288						4	53194.1	39.1133
		5	81.6	62.91	105.44	140.66	182.88	114.698						5	10.45	9.22	8.59	10.02	9.62	9.58						5	39519.9	29.0587
		6	189.24	184	136.87	118.39	117.27	149.154						6	7.19	7.1	8.09	8.37	9.17	7.984						6	52294	38.4515
		7	229.66	198.93	138.62	153.86	151.95	174.604						7	9.32	8.79	10.62	9.62	8.5	9.37						7	42090.5	30.9489
		8	162.98	159.6	155.65	104.09	95.28	135.52						8	7.65	11.38	9.5	9.75	10.94	9.844						8	40464.8	29.7536
		9	124.4	153.26	157.55	138.72	152.21	145.228						9	9.22	12.56	12.56	9.81	9.9	10.81						9	46934.7	34.5108
		10	151.22	134.25	158.82	124.88	135.36	140.906						10	10.14	9.69	10.01	10.21	9.1	9.83						10	48348.5	35.5504
	2	1	110.4	85.61	140.63	87.93	106.51	106.216	111.161				2	1	11.67	8.76	9.18	8.59	10.45	9.73	9.3292				2	1	36200.6	26.6181	27.1496
		2	96.21	141.29	108.79	108.14	106.23	112.132						2	11.37	7.68	8.79	10.14	9.59	9.514						2	36277.2	26.6744
		3	124.45	89.04	113.26	138.86	120.45	117.212						3	10.01	8.99	9.59	12.94	13.81	11.068						3	38481.8	28.2954
		4	121.12	111.81	103.31	107.15	102.48	109.174						4	7.65	8.34	8.59	4.6	6.98	7.232						4	32578.8	23.955
		5	101.52	110.71	109.43	132.82	148.64	120.624						5	7.51	10.82	10.49	10.71	10.02	9.91						5	35769.8	26.3013
		6	108.33	102.91	116.65	122.88	110	112.154						6	9.62	10.21	8.01	9.72	10.54	9.62						6	35929.6	26.4188
		7	116.82	102.77	123.88	114.73	141.21	119.882						7	8.7	7.12	8.09	9.18	9.62	8.542						7	33927.4	24.9467
		8	98.12	120.45	109.95	123.64	107.38	111.908						8	6.98	6.87	6.31	8.5	6.67	7.066						8	33925.8	24.9454
		9	92.83	93.16	86.67	122.11	114.39	101.832						9	10.31	13.57	10.07	8.75	8.76	10.292						9	33952.9	24.9654
		10	87.29	112.62	105.31	100.52	96.63	100.474						10	10.65	10.45	11.25	11.73	7.51	10.318						10	52190.9	38.3756
0.5 µg p,p´-DDE/g egg	1	1	90.34	79.6	94.55	99.2	46.85	82.108	127.049	141.829			3	1	7.28	9.72	12.92	12.78	11	10.74	9.4188				3	1	35962.9	26.4433	23.5609
		2	101.04	100.37	94.61	82.84	99.4	95.652						2	6.19	5.67	6.9	4.86	5.67	5.858						2	36680.4	26.9709
		3	112.28	119.32	114.41	88.37	103.35	107.546						3	11.62	11.93	10.03	11.86	8.7	10.828						3	40798.9	29.9992
		4	111.69	117.33	77.46	86.04	112.67	101.038						4	10.25	9.9	9.69	9.51	15.68	11.006						4	33017.7	24.2777
		5	121.07	125.9	134.17	128.7	129.27	127.822						5	9.36	10.07	7.91	9.75	7.66	8.95						5	25746.4	18.9312
		6	172.51	166.77	138.41	125.97	152.89	151.31						6	10.55	7.92	7.51	9.25	6.87	8.42						6	27895.2	20.5112
		7	106.23	92.56	133.53	89.83	71.9	98.81						7	10.55	11.01	10.31	11.28	12.98	11.226						7	28533.9	20.9808
		8	217.08	190.31	220.18	185.76	171.47	196.96						8	7.28	10.14	7.93	9.62	8.37	8.668						8	35549.8	26.1395
		9	220.76	199.81	218.41	201.87	193.73	206.916						9	7.28	7.28	9.15	8.7	11.12	8.706						9	25335.1	18.6287
		10	106.51	99.62	81.66	109.43	114.41	102.326						10	8.76	9.62	11.37	12.5	6.68	9.786						10	30908.1	22.7266
	2	1	202.12	179.07	157.64	177.42	216.67	186.584	156.319				4	1	10.83	10.01	10.83	9.25	7.78	9.74	11.195				4	1	46851.8	34.4499	36.1714
		2	166.67	119.06	120.49	174.5	131.79	142.502						2	10.91	10.87	12.92	14.17	12.15	12.204						2	46096	33.8941
		3	147.97	160.76	159.98	159.92	149.23	155.572						3	10.49	10.84	10.91	10.14	11.32	10.74						3	44583.9	32.7822
		4	186.84	182.31	154.34	104.89	145.75	154.826						4	10.49	12.11	8.33	10.42	10.42	10.354						4	49352.7	36.2887
		5	149.95	171.59	139.37	105.42	160.37	145.34						5	10.14	11.22	9.18	13.16	10.31	10.802						5	55703.5	40.9584
		6	163.72	150.46	150.81	113.14	151.1	145.846						6	13.57	10.21	11.73	10	10.31	11.164						6	40830.7	30.0226
		7	153.05	157.54	147.78	140.5	128.36	145.446						7	10.83	13.71	14.49	12.53	11.22	12.556						7	49190.2	36.1692
		8	166.04	170.1	162.38	162.25	144	160.954						8	16.09	11	12	9.5	10.02	11.722						8	51410.8	37.802
		9	165.69	155.41	159.76	164.54	162.07	161.494						9	11.62	9.81	11.44	11.37	8.05	10.458						9	52958.1	38.9398
		10	172.34	148.97	145.81	194.84	161.18	164.628						10	11.2	11.49	12.08	13.42	12.86	12.21						10	54954	40.4074
	3	1	192.07	172.73	210.09	172.79	182.04	185.944	159.262			50 µg p,p´-DDE/g egg	1	1	10.03	8.34	10.31	8.39	6.87	8.788	9.7876	10.5645		50 µg p,p´-DDE/g egg	1	1	37176.7	27.3358	30.7213	32.7595
		2	172.68	188.58	151.63	161.05	175.64	169.916						2	5.97	6.87	7.12	7.55	6.68	6.838						2	40921.3	30.0892
		3	172.7	173.89	186.44	192.84	154.93	176.16						3	7.38	7.28	10.62	10.44	10.02	9.148						3	42738.1	31.4251
		4	144.36	157.52	177.01	167.01	139.15	157.01						4	8.01	11.85	11.32	11.67	12.43	11.056						4	51966.5	38.2107
		5	180.75	112.73	158.5	145.56	127.33	144.974						5	11.92	11.74	9.32	8.83	11.46	10.654						5	41394	30.4368
		6	151.63	167.85	170.69	184.17	142.77	163.422						6	9.25	10.31	9.18	8.79	9.14	9.334						6	47515.8	34.9381
		7	135.53	127.3	146.61	163.72	148.37	144.306						7	9.5	9.2	7.92	11.28	6.67	8.914						7	35718.7	26.2637
		8	129.08	135.66	173.39	132.36	165.69	147.236						8	8.7	10.15	7.28	10.25	10.82	9.44						8	38871.5	28.582
		9	114.7	144.21	157.39	156.75	182.07	151.024						9	9.36	10.54	12.15	13.85	10.31	11.242						9	38326.5	28.1812
		10	137.66	147.58	151.51	157.71	168.69	152.63						10	11	13.31	11.55	14.37	12.08	12.462						10	43179.9	31.7499
	4	1	199.23	222.43	183.52	181.09	177.05	192.664	160.928				2	1	10.91	11.38	7.38	7.28	7.91	8.972	10.2116				2	1	37951	27.9052	33.0183
		2	153.05	177.88	188.48	168.27	211.66	179.868						2	9.5	9.32	10.08	8.99	8.39	9.256						2	52342.8	38.4873
		3	195.11	173.86	196.87	169.06	181.03	183.186						3	6.73	10.82	8.98	11.61	8.91	9.41						3	37987.8	27.9322
		4	179.27	196.85	209.07	161.93	192.85	187.994						4	11.44	10.87	13.65	12.61	10.45	11.804						4	42746.7	31.4314
		5	146.26	151.83	132.59	145.13	185.76	152.314						5	11.18	9.36	12.86	10.45	12.15	11.2						5	45774.6	33.6578
		6	174.22	201.28	117.03	142.96	162.36	159.57						6	7.12	14.01	13.71	10.81	10.81	11.292						6	52943.8	38.9293
		7	157.61	139.19	160	162.11	146.98	153.178						7	11.46	14.46	12.08	14.06	14.63	13.338						7	48949.4	35.9922
		8	135.43	139.65	133.37	145.12	160.04	142.722						8	9.1	8.7	7.83	7.83	9.36	8.564						8	36761.1	27.0302
		9	108.92	128.2	126.69	163	162.49	137.86						9	6.73	5.43	8.76	9.14	7.51	7.514						9	48992.4	36.0238
		10	98.9	126.23	131.09	125.65	117.76	119.926						10	10.44	9.88	10.29	11.46	11.76	10.766						10	44598.7	32.7932
	5	1	111.39	110.23	107.01	142.36	117.43	117.684	105.584				3	1	13.44	12.09	8.76	12.03	13.74	12.012	12.234				3	1	47542	34.9574	34.5129
		2	126.55	78.32	97.63	90.14	103.49	99.226						2	10.71	10.82	11.93	8.79	11.73	10.796						2	40954.1	30.1133
		3	82.8	117.06	110.16	85.7	123.38	103.82						3	12.75	13.34	10.49	9.62	12.11	11.662						3	46123.9	33.9147
		4	81.86	131.11	76.02	93.99	115.85	99.766						4	15.68	12.15	13.71	11.38	9.9	12.564						4	41695.7	30.6586
		5	158.23	118.08	132.76	117.01	100.14	125.244						5	11.26	11.37	11.7	10.42	13.44	11.638						5	46641.6	34.2953
		6	108.92	99.37	116.32	73.53	106.57	100.942						6	14.39	15.09	12.51	13.16	10.42	13.114						6	38799	28.5287
		7	109.56	102.5	93.99	105.41	84.98	99.288						7	12.56	11.67	13.34	15.42	13.39	13.276						7	48294.8	35.5109
		8	99.7	110.84	96.91	116.68	118.76	108.578						8	13.36	12.53	12.15	13.08	13.24	12.872						8	54388.3	39.9914
		9	86.78	100	95.18	83.81	125	98.154						9	7.68	8.91	9.22	11.73	12.09	9.926						9	61061.1	44.8979
		10	107.96	115.86	111.78	77.55	102.55	103.14						10	14.59	13.78	15.44	13.57	15.02	14.48						10	43874.8	32.2609
5 µg p,p´-DDE/g egg	1	1	112.28	99.98	121.34	138.99	131.5	120.818	122.195	144.792			4	1	13.81	10.96	9.73	10.01	11.37	11.176	11.2848				4	1	52396	38.5265	38.9066
		2	73.81	87.9	125.97	142.02	161.28	118.196						2	9.62	12.53	15.05	14.61	8.43	12.048						2	59862.1	44.0162
		3	59.82	78.62	114.92	150.48	165.34	113.836						3	10.45	9.66	10.91	11.26	11.03	10.662						3	57262.1	42.1045
		4	60.88	78.35	110.69	152.56	167.13	113.922						4	13.39	7.5	10.96	12.56	10.42	10.966						4	51501.2	37.8686
		5	73.42	99.18	101.74	144.01	157.69	115.208						5	10.42	11.33	11.86	9.73	8.43	10.354						5	47488.5	34.918
		6	83.12	102.9	110	139.97	155.11	118.22						6	12.15	12.56	15.42	15.01	15	14.028						6	47016.8	34.5711
		7	161.7	138.46	110.11	114.24	106.83	126.268						7	12.43	11.62	11.12	12.53	10.02	11.544						7	51120	37.5883
		8	139.33	152.83	137.59	156.05	134	143.96						8	11.22	11.86	10.15	8.91	9.4	10.308						8	53394.2	39.2604
		9	123.77	132.34	136.33	133.3	144.72	134.092						9	10.62	10.49	10.55	11.26	12.11	11.006						9	51420	37.8088
		10	112.5	109.87	87.12	134.5	143.14	117.426						10	11.26	10.01	11.22	10.84	10.45	10.756						10	57668.3	42.4032
	2	1	151.12	180.9	174.24	169.22	160.25	167.146	150.24				5	1	11.25	10	9.62	8.75	7.92	9.508	9.2998				5	1	47716.3	35.0855	31.828
		2	161	167.63	173.81	173.13	160.49	167.212						2	8.39	8.39	9.25	7.78	8.37	8.436						2	46646.9	34.2992
		3	156.71	161.8	176.31	161.9	165.92	164.528						3	8.34	9.2	8.91	8.37	10.96	9.156						3	45819.7	33.691
		4	152.76	137.12	141.99	127.2	143.18	140.45						4	8.09	11.03	10.83	8.37	8.75	9.414						4	38548.3	28.3443
		5	146.9	155.94	159.88	144.27	146.3	150.658						5	8.09	11.03	10.83	8.37	8.75	9.414						5	38541.1	28.339
		6	166.22	139.74	135.28	117.52	132.76	138.304						6	8.09	11.03	10.83	8.37	8.75	9.414						6	41282.3	30.3546
		7	166.99	163.41	137.44	115.59	121.32	140.95						7	8.09	11.03	10.83	8.37	8.75	9.414						7	47656.4	35.0415
		8	170.22	164.25	160.52	147.05	116.43	151.694						8	8.09	11.03	10.83	8.37	8.75	9.414						8	36877.9	27.1161
		9	155.78	159.48	154.71	117.8	113.07	140.168						9	8.09	11.03	10.83	8.37	8.75	9.414						9	48168.3	35.4179
		10	158.14	170.22	139.62	116.7	121.75	141.286						10	8.09	11.03	10.83	8.37	8.75	9.414						10	41603.5	30.5908
	3	1	154.17	165.76	190.82	120.78	148.57	156.02	146.689				6	1	13.34	13.36	11.7	10.08	12.94	12.284	10.5692				6	1	32731.4	24.0672	27.5699
		2	152.98	150.58	168.65	207.66	172.65	170.504						2	8.43	8.91	9.18	7.92	7.55	8.398						2	38836.1	28.556
		3	166.04	209.11	146.5	156.8	199.85	175.66						3	10.62	10.02	9.5	9.36	10.54	10.008						3	38385.3	28.2245
		4	180.23	129.46	86.49	198.72	145.24	148.028						4	12.39	9.83	11.21	10.94	12.39	11.352						4	35057.7	25.7777
		5	182.85	167.72	144.96	93.58	114.79	140.78						5	12.75	12.92	12.15	7.68	11.28	11.356						5	39352.2	28.9354
		6	145.77	157.84	128.46	179.85	152.12	152.808						6	11.26	9.45	9.83	10.09	7.68	9.662						6	34884.6	25.6505
		7	149.67	135.28	117.41	128.95	134.18	133.098						7	13.62	13.71	10.82	9.5	11.7	11.87						7	39815.9	29.2764
		8	121.87	154.94	108.99	121.25	89.2	119.25						8	10.08	12.43	14	11.52	10.52	11.71						8	43418	31.925
		9	120.01	117.77	116.51	124.77	103.98	116.608						9	9.51	9.15	8.95	10.71	9.4	9.544						9	35808.2	26.3295
		10	137.59	155.1	141.39	182.61	153.97	154.132						10	9.32	10.08	10.02	9.45	8.67	9.508						10	36661.9	26.9573
	4	1	124.64	158.89	147.22	84.04	104.19	123.796	112.36
		2	106.59	119.97	119.94	119.97	91.47	111.588
		3	135.66	131.07	126.34	113	122.75	125.764
		4	111.83	107.95	114.64	116.51	93.5	108.886
		5	82.67	106.66	110.88	122.73	122.08	109.004
		6	94.78	102.76	122.19	120.75	122.31	112.558
		7	86.7	107.71	122.27	117.76	71.74	101.236
		8	121.58	88.07	117.41	86.49	104.62	103.634
		9	126.89	146.37	100.35	60.6	139.64	114.77
		10	-	-	-	-	-	-
	5	1	214.68	240.51	256.27	186.38	235.5	226.668	184.892
		2	221.14	203.3	242.42	266.69	210.56	228.822
		3	191.06	223.27	215.04	195.85	156.81	196.406
		4	196.56	196.07	203.73	226.67	168.08	198.222
		5	167.01	185.41	201.99	167.38	191.64	182.686
		6	151.34	178.22	136.03	135.32	157.07	151.596
		7	182.51	165.8	166.59	139.53	142.91	159.468
		8	173.24	163.42	104.25	118.2	117.22	135.266
		9	-	-	-	-	-	-
		10	-	-	-	-	-	-
	6	1	160.29	151.55	155.21	169.94	128.85	153.168	152.379
		2	112.67	148.42	138.17	172.85	143.02	143.026
		3	189.48	151.22	167.72	131.49	150.95	158.172
		4	175.64	166.1	171.82	160.78	143.57	163.582
		5	151.7	137.58	164.28	164.47	150.08	153.622
		6	156.54	170.66	143.53	158.97	143.09	154.558
		7	138.25	136.85	134.13	162.77	157.32	145.864
		8	117.21	168.53	191.12	158.36	161.38	159.32
		9	162.52	153.39	153.84	131.51	125.17	145.286
		10	143.47	125.22	133.88	187.94	145.45	147.192
50 µg p,p´-DDE/g egg	1	1	149.08	138.69	131.89	106.74	79.34	121.148	125.599	129.756
		2	113.64	139.47	125.51	149.23	147.01	134.972
		3	79.92	65.19	108.23	111.98	135.86	100.236
		4	97.51	121.74	134.67	112.04	139.24	121.04
		5	95.11	76.74	94.46	122.64	136.83	105.156
		6	135.02	139.06	164.17	89.23	119.18	129.332
		7	115.05	139.17	140.48	158.44	147.05	140.038
		8	145.04	158.21	156.72	115.5	99.53	135
		9	98.78	127.37	134.37	149.2	154.67	132.878
		10	134.48	163.44	141.08	115.59	126.34	136.186
	2	1	138.79	127.55	114.08	130.86	137.62	129.78	133.914
		2	145.04	114.82	137.32	113.35	121.07	126.32
		3	147.43	139.29	151.56	124.5	127.54	138.064
		4	139.09	132.23	132.54	138.83	141.73	136.884
		5	176.67	139.94	155.75	147.6	168.67	157.726
		6	150.43	119.06	87.69	131.37	145.8	126.87
		7	151.8	144.72	156.72	157.11	120.97	146.264
		8	134.13	145.69	146.67	168.34	172.51	153.468
		9	109.12	103.31	95.2	113.03	104.6	105.052
		10	164.13	123.67	127.56	79.9	98.3	118.712
